# Supplementary material for: Accurate non-covalent interaction energies on noisy intermediate-scale quantum computers via second-order symmetry-adapted perturbation theory
Source: Royal Society of Chemistry journal article supplement (doi:10.1039/d2sc05896k), 2023-01-01

Error  $\varepsilon$  (kcal/mol) H<sub>2</sub>O Dimer

$\varepsilon(\Delta E_{\text{abs}}(\text{VQE}(k=1)))$   $\varepsilon(\Delta E_{\text{abs}}(\text{VQE}(k=4)))$   
 $\varepsilon(\Delta E_{\text{int}}(\text{VQE}(k=1)))$   $\varepsilon(\Delta E_{\text{int}}(\text{VQE}(k=4)))$

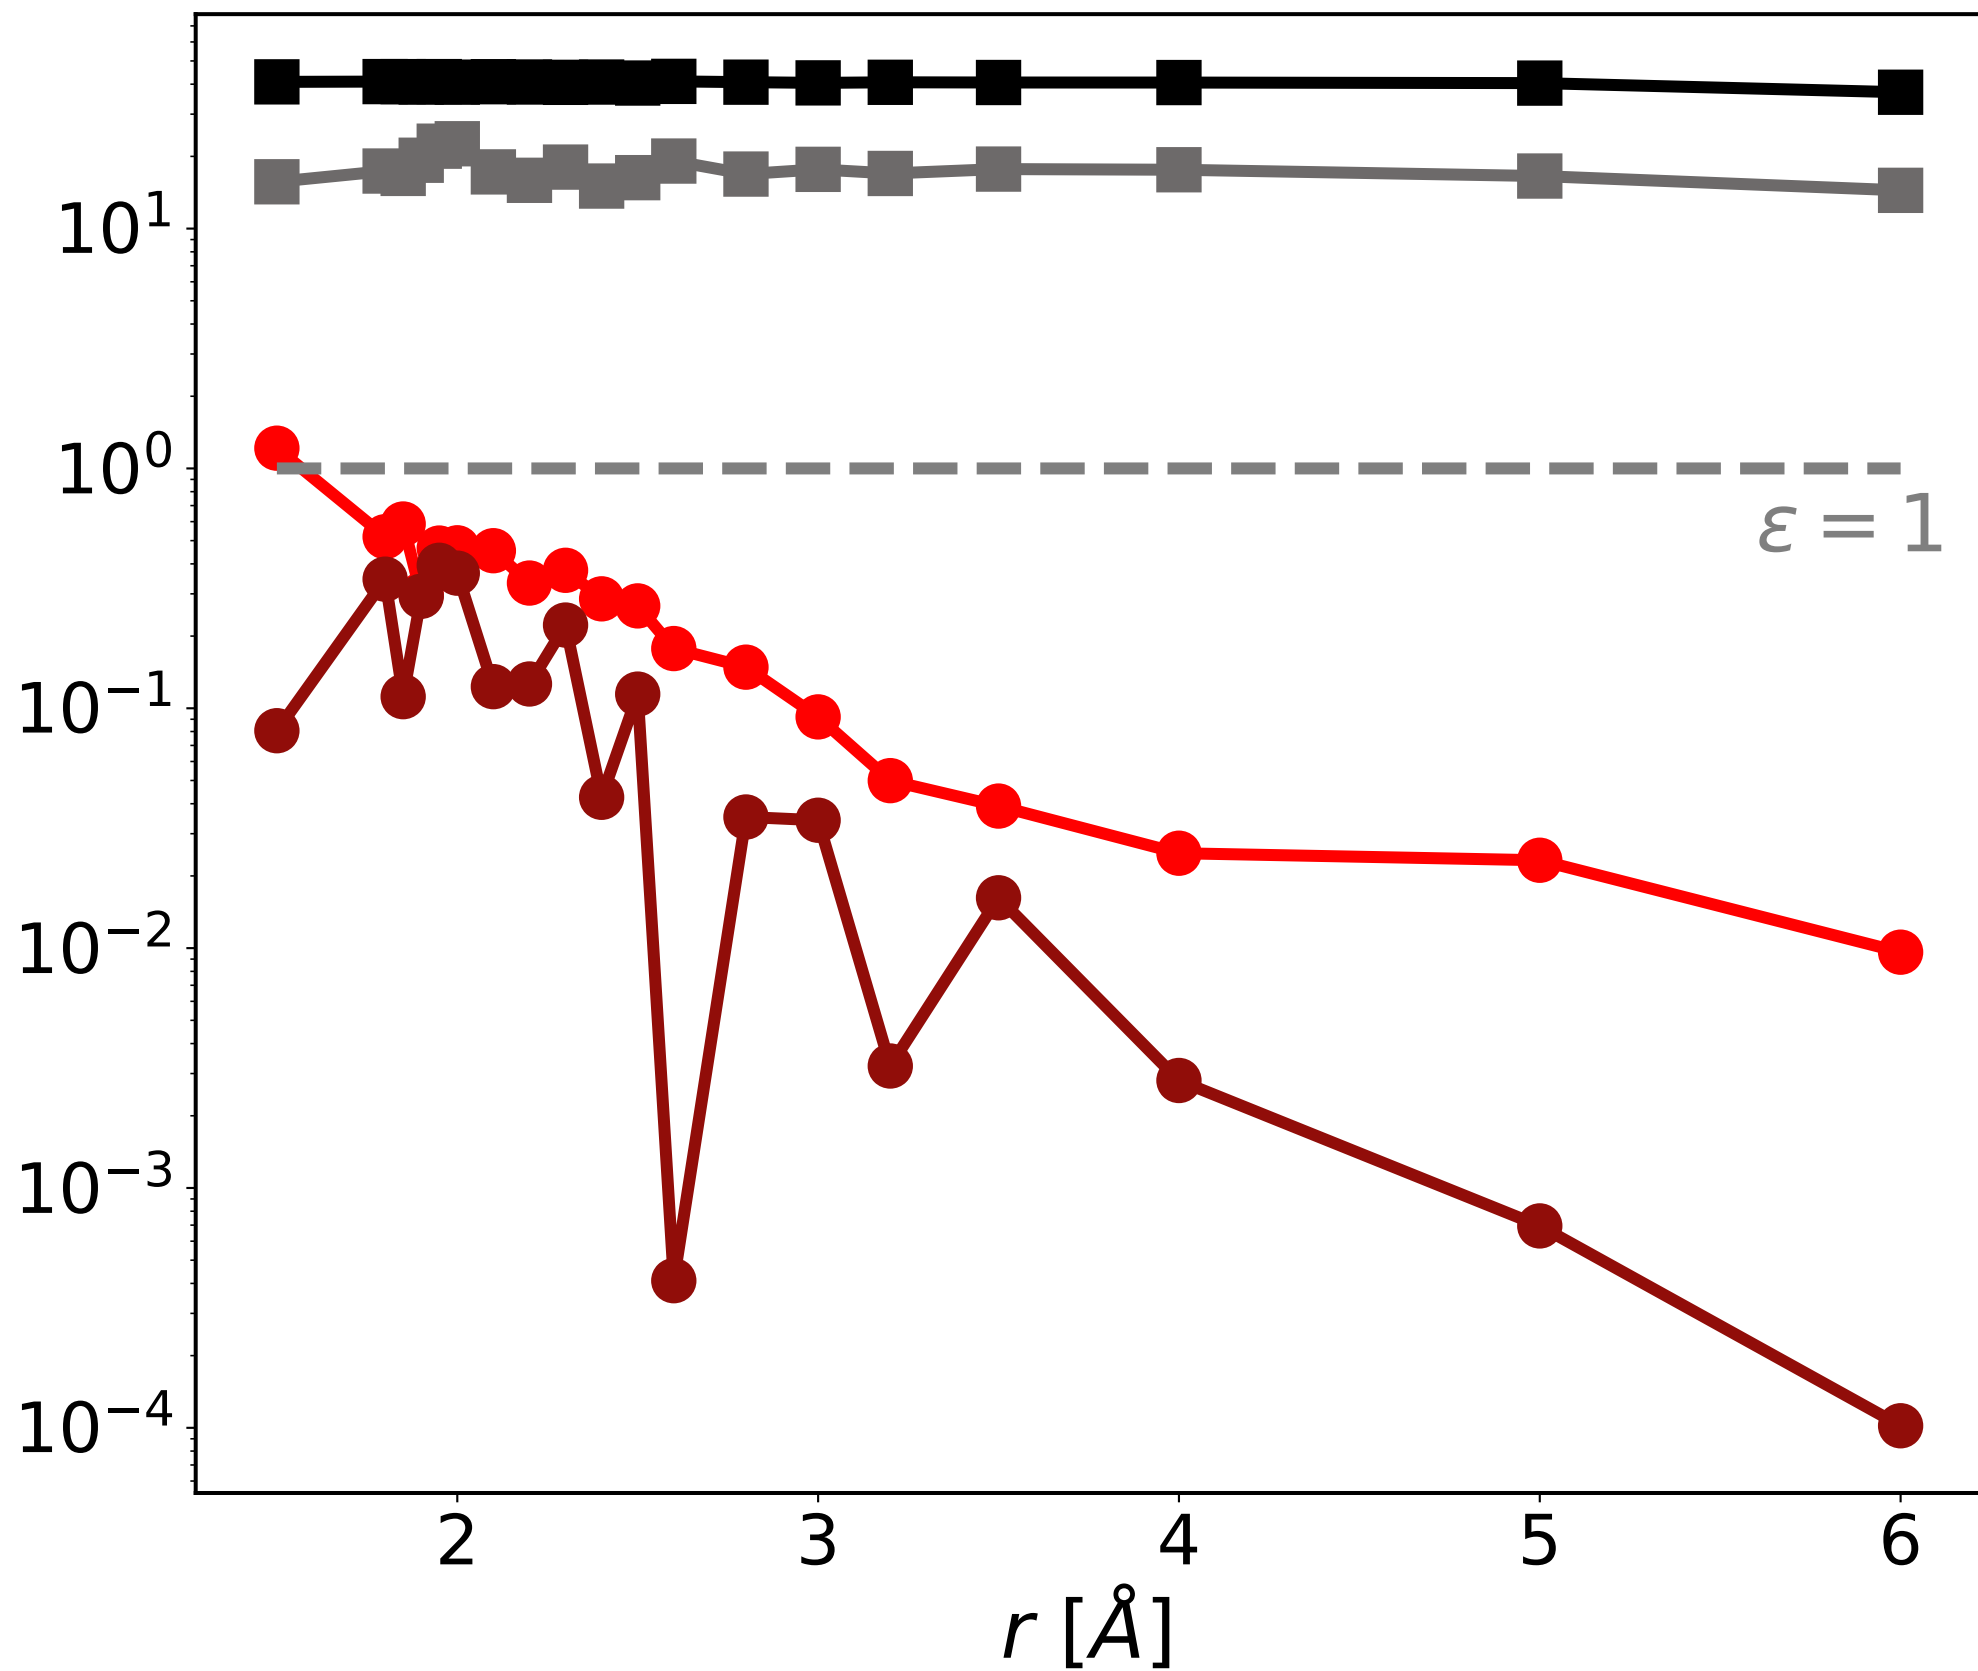

Supplement: d2sc05896k1.zip [file d2sc05896k1.zip]
