# Supplementary material for: Accurate non-covalent interaction energies on noisy intermediate-scale quantum computers via second-order symmetry-adapted perturbation theory
Source: Royal Society of Chemistry journal article supplement (doi:10.1039/d2sc05896k), 2023-01-01

$$E_{\text{int}} = ?$$

## NISQ computation

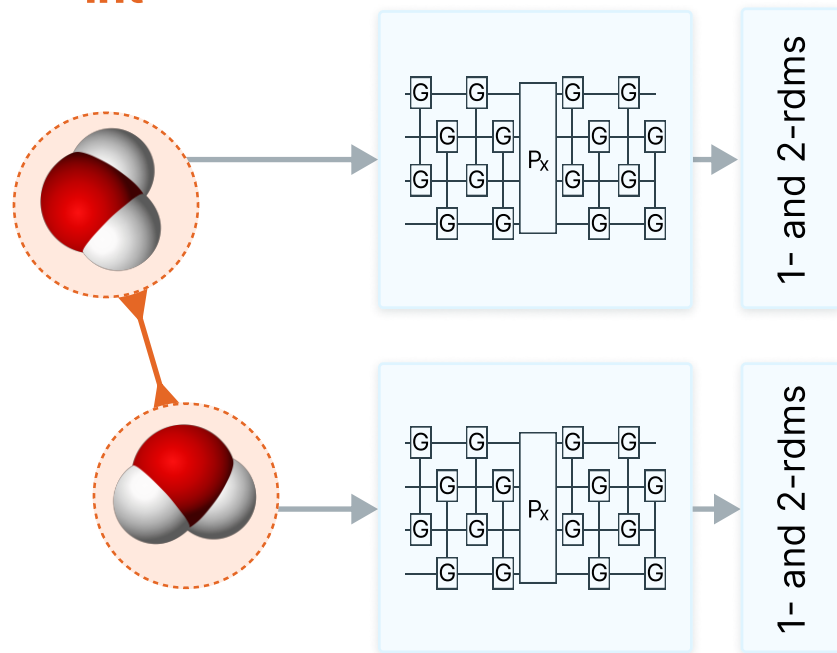

## Classical computation

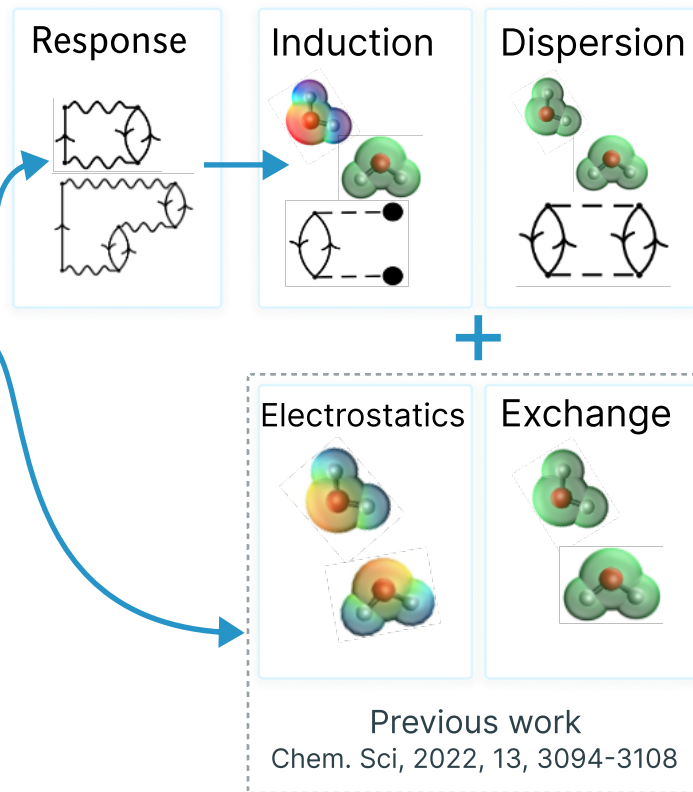

SAPT components

## Full interaction energy

$$E_{\text{int}} = E_{\text{elst}} + E_{\text{exch}} + E_{\text{ind}} + E_{\text{disp}}$$

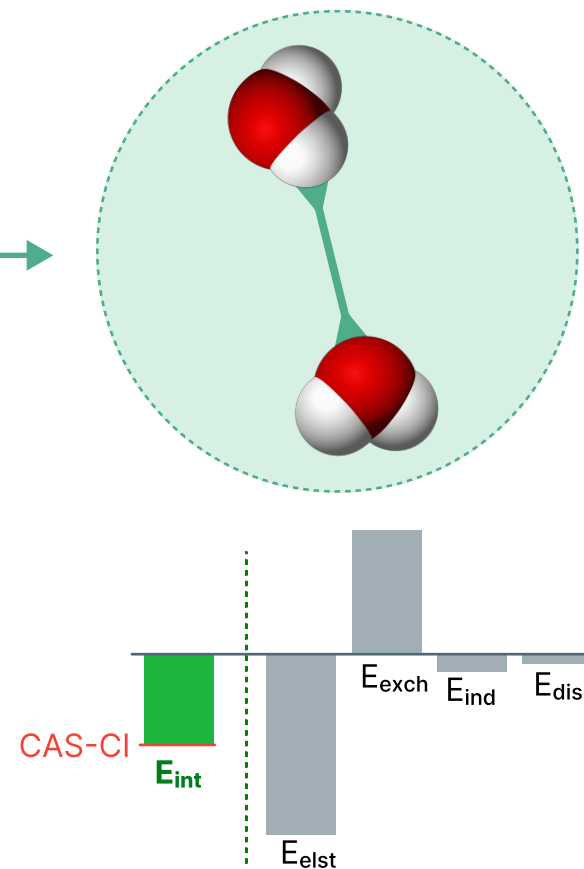

Supplement: d2sc05896k1.zip [file d2sc05896k1.zip]
