# Supplementary figures and images for: Accurate non-covalent interaction energies on noisy intermediate-scale quantum computers via second-order symmetry-adapted perturbation theory
Source: Royal Society of Chemistry journal article supplement (doi:10.1039/d2sc05896k), 2023-01-01

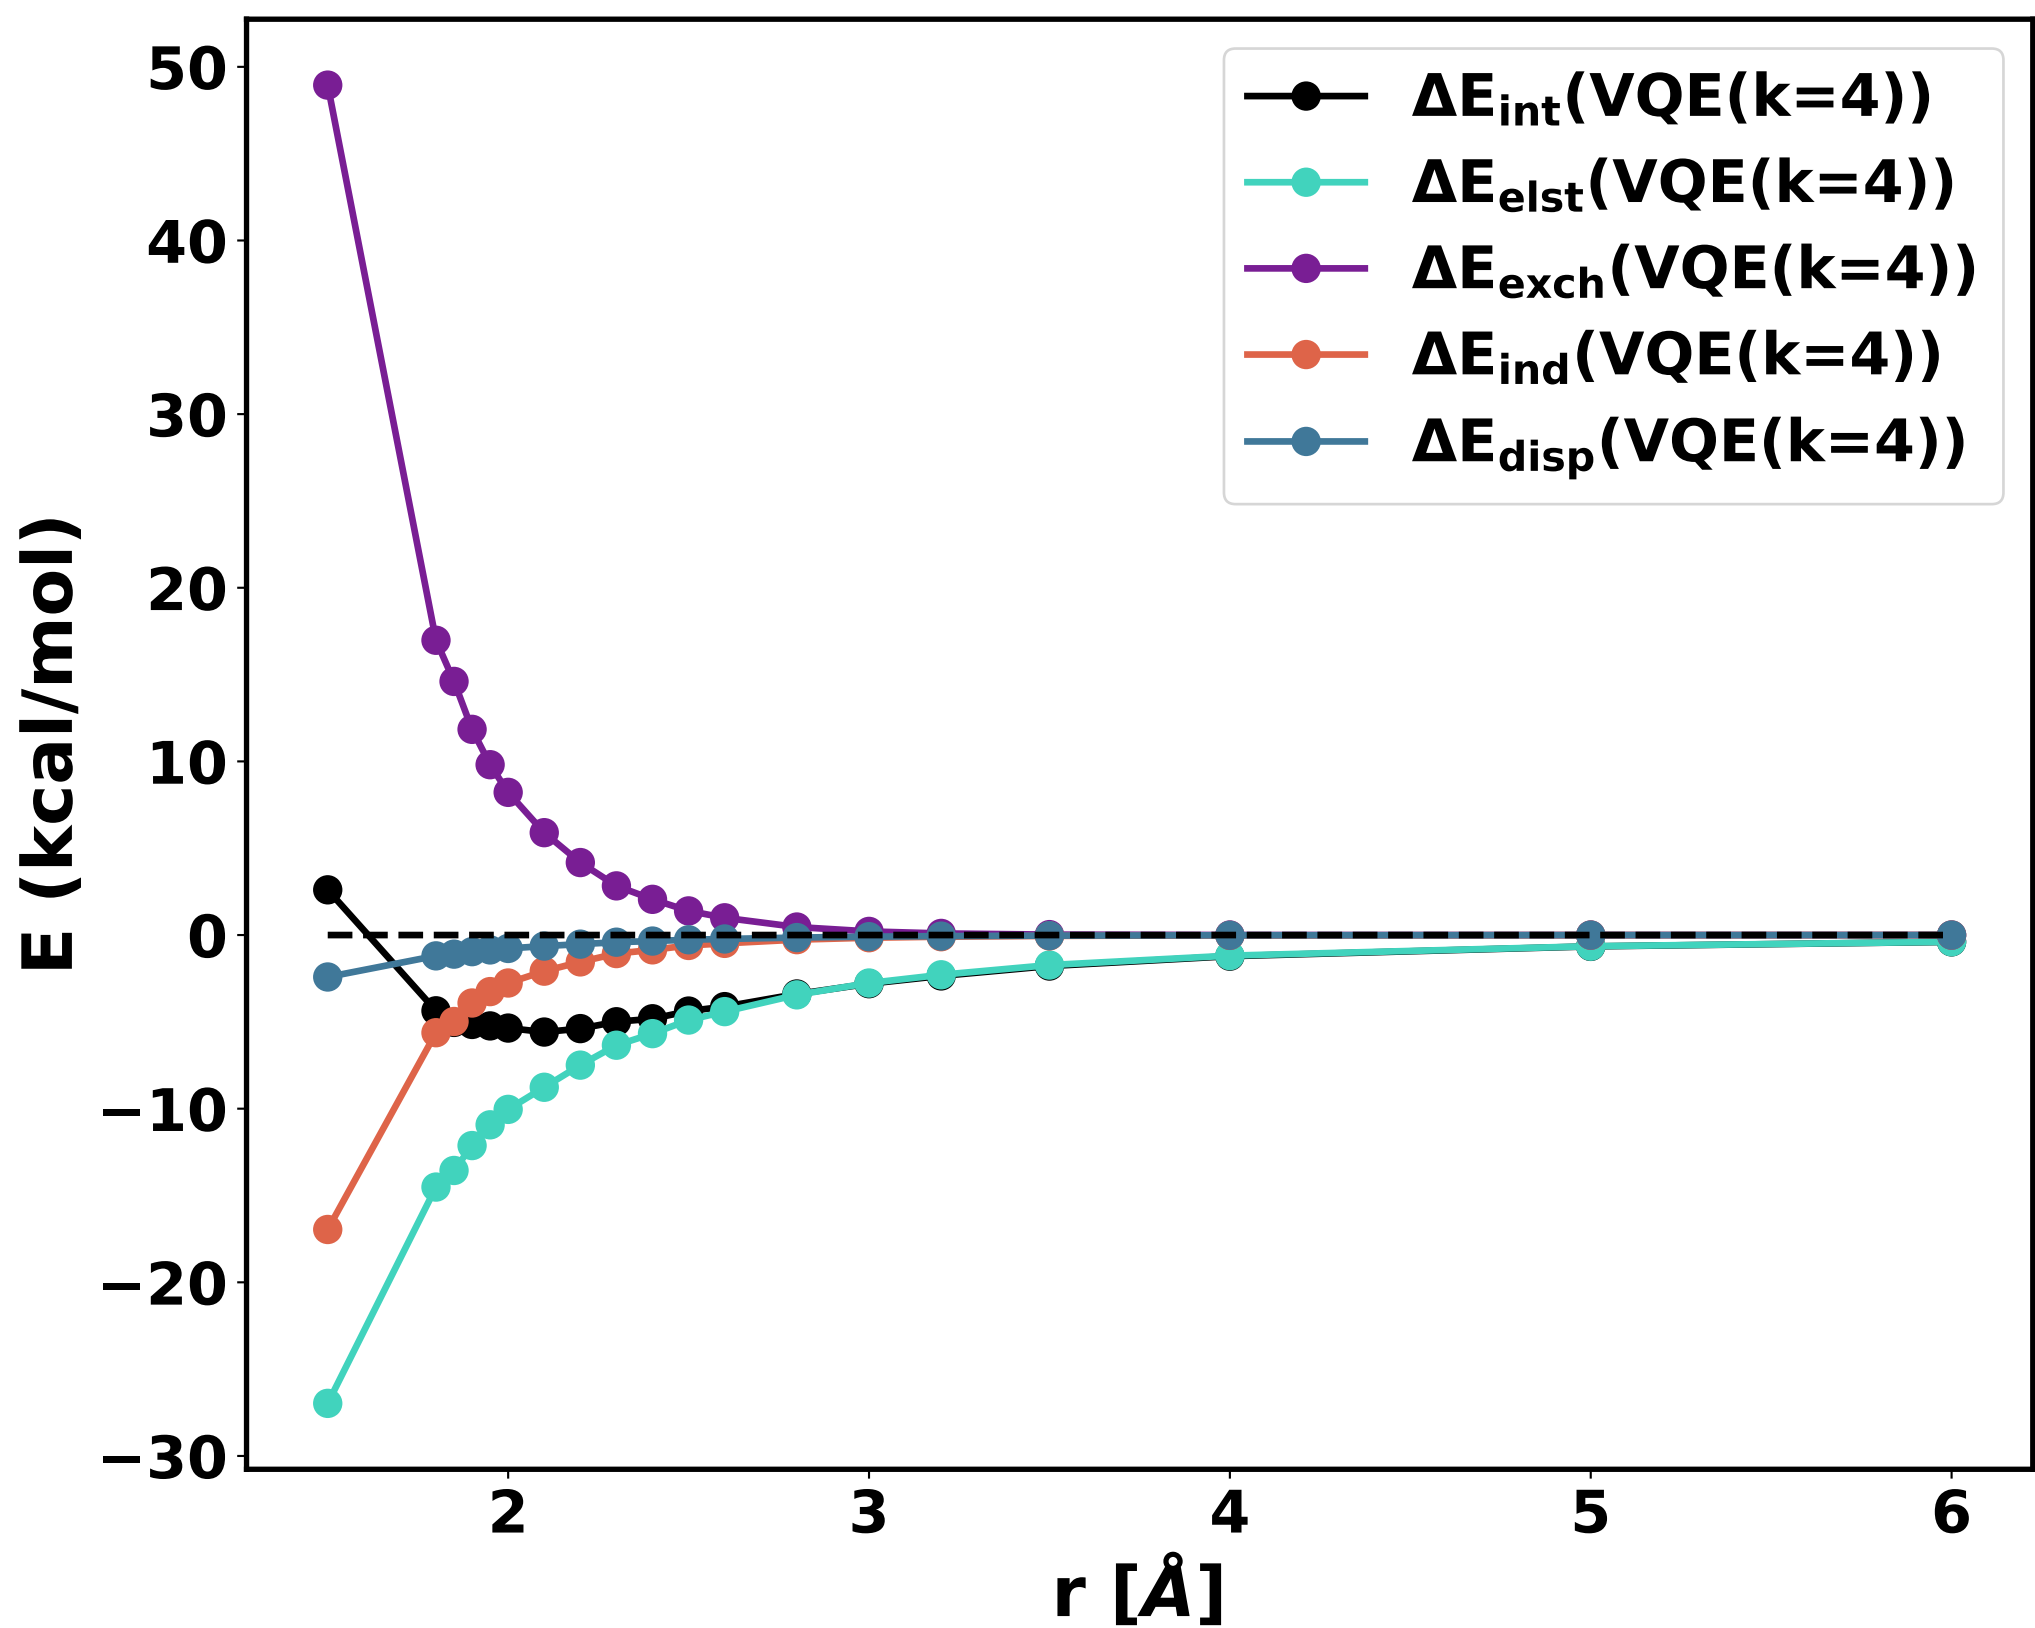

Supplement: d2sc05896k1.zip [file d2sc05896k1.zip]

Error  $\varepsilon$  (kcal/mol) p-Bz Bz Dimer

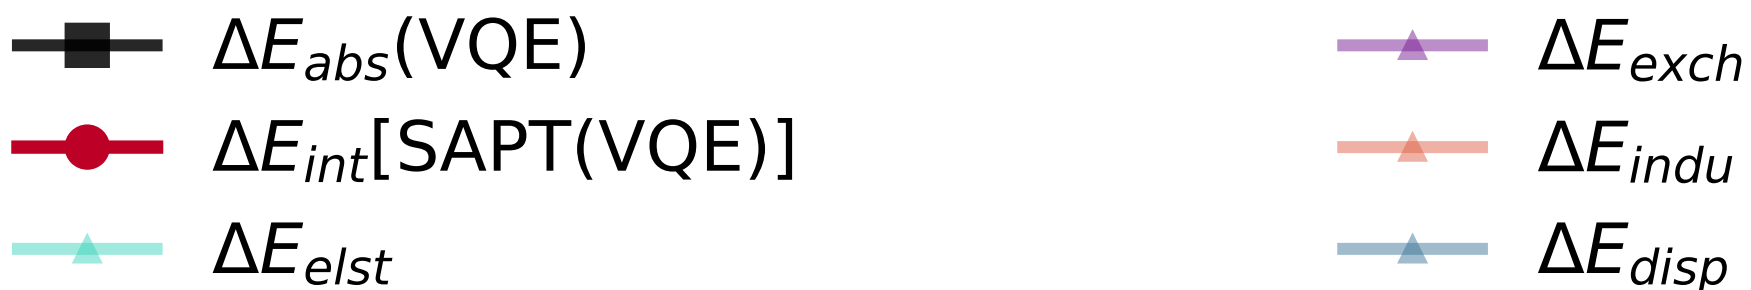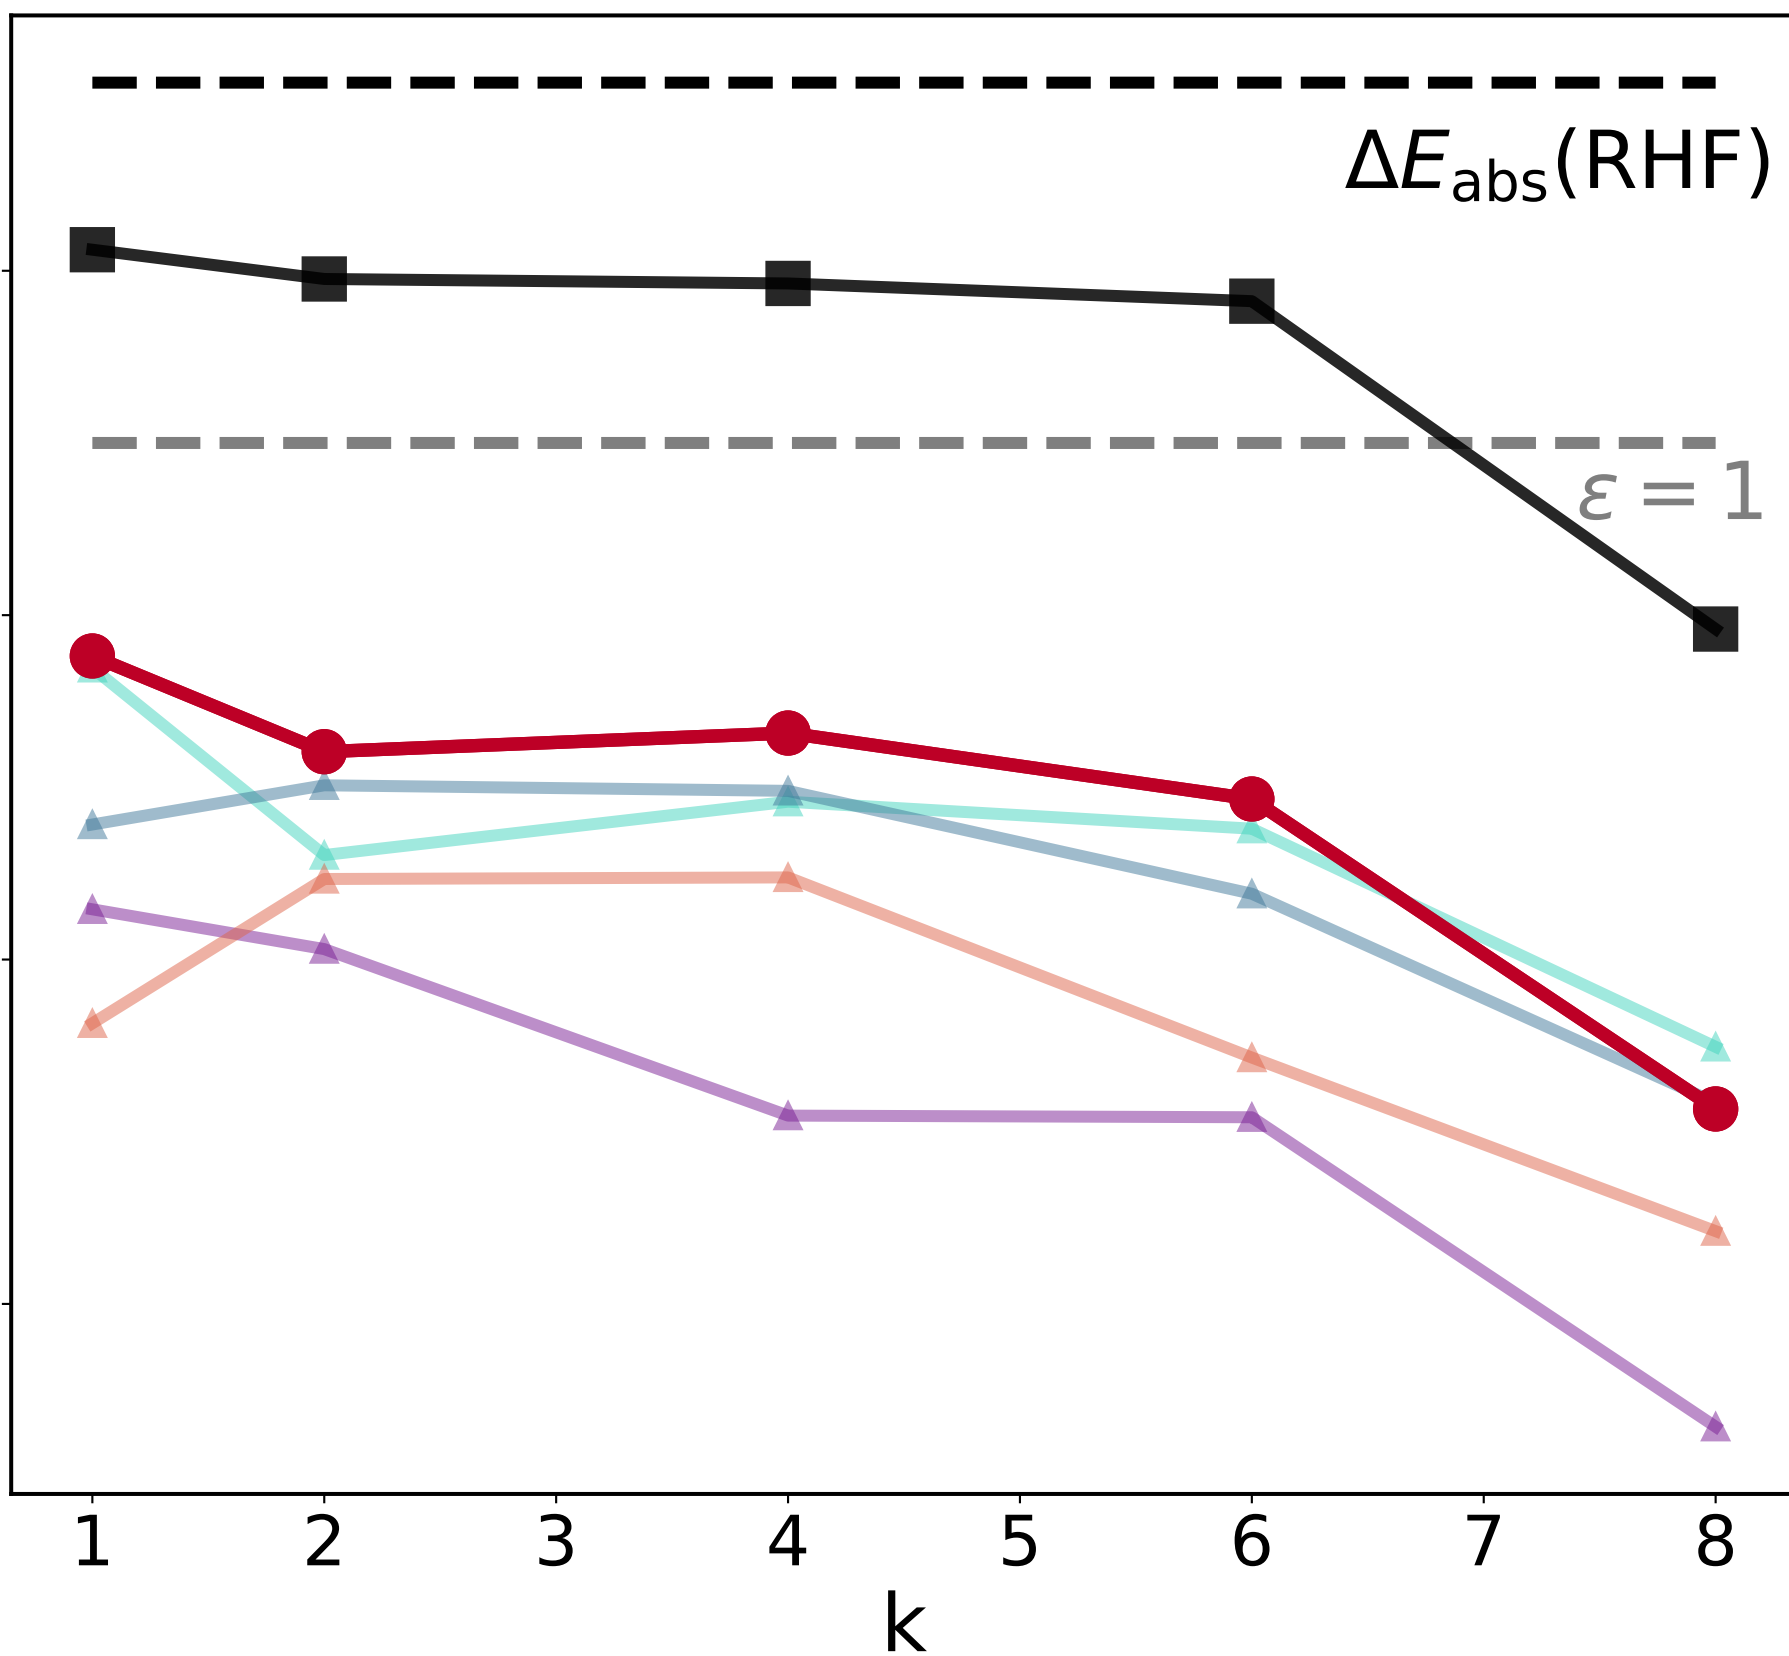

Supplement: d2sc05896k1.zip [file d2sc05896k1.zip]

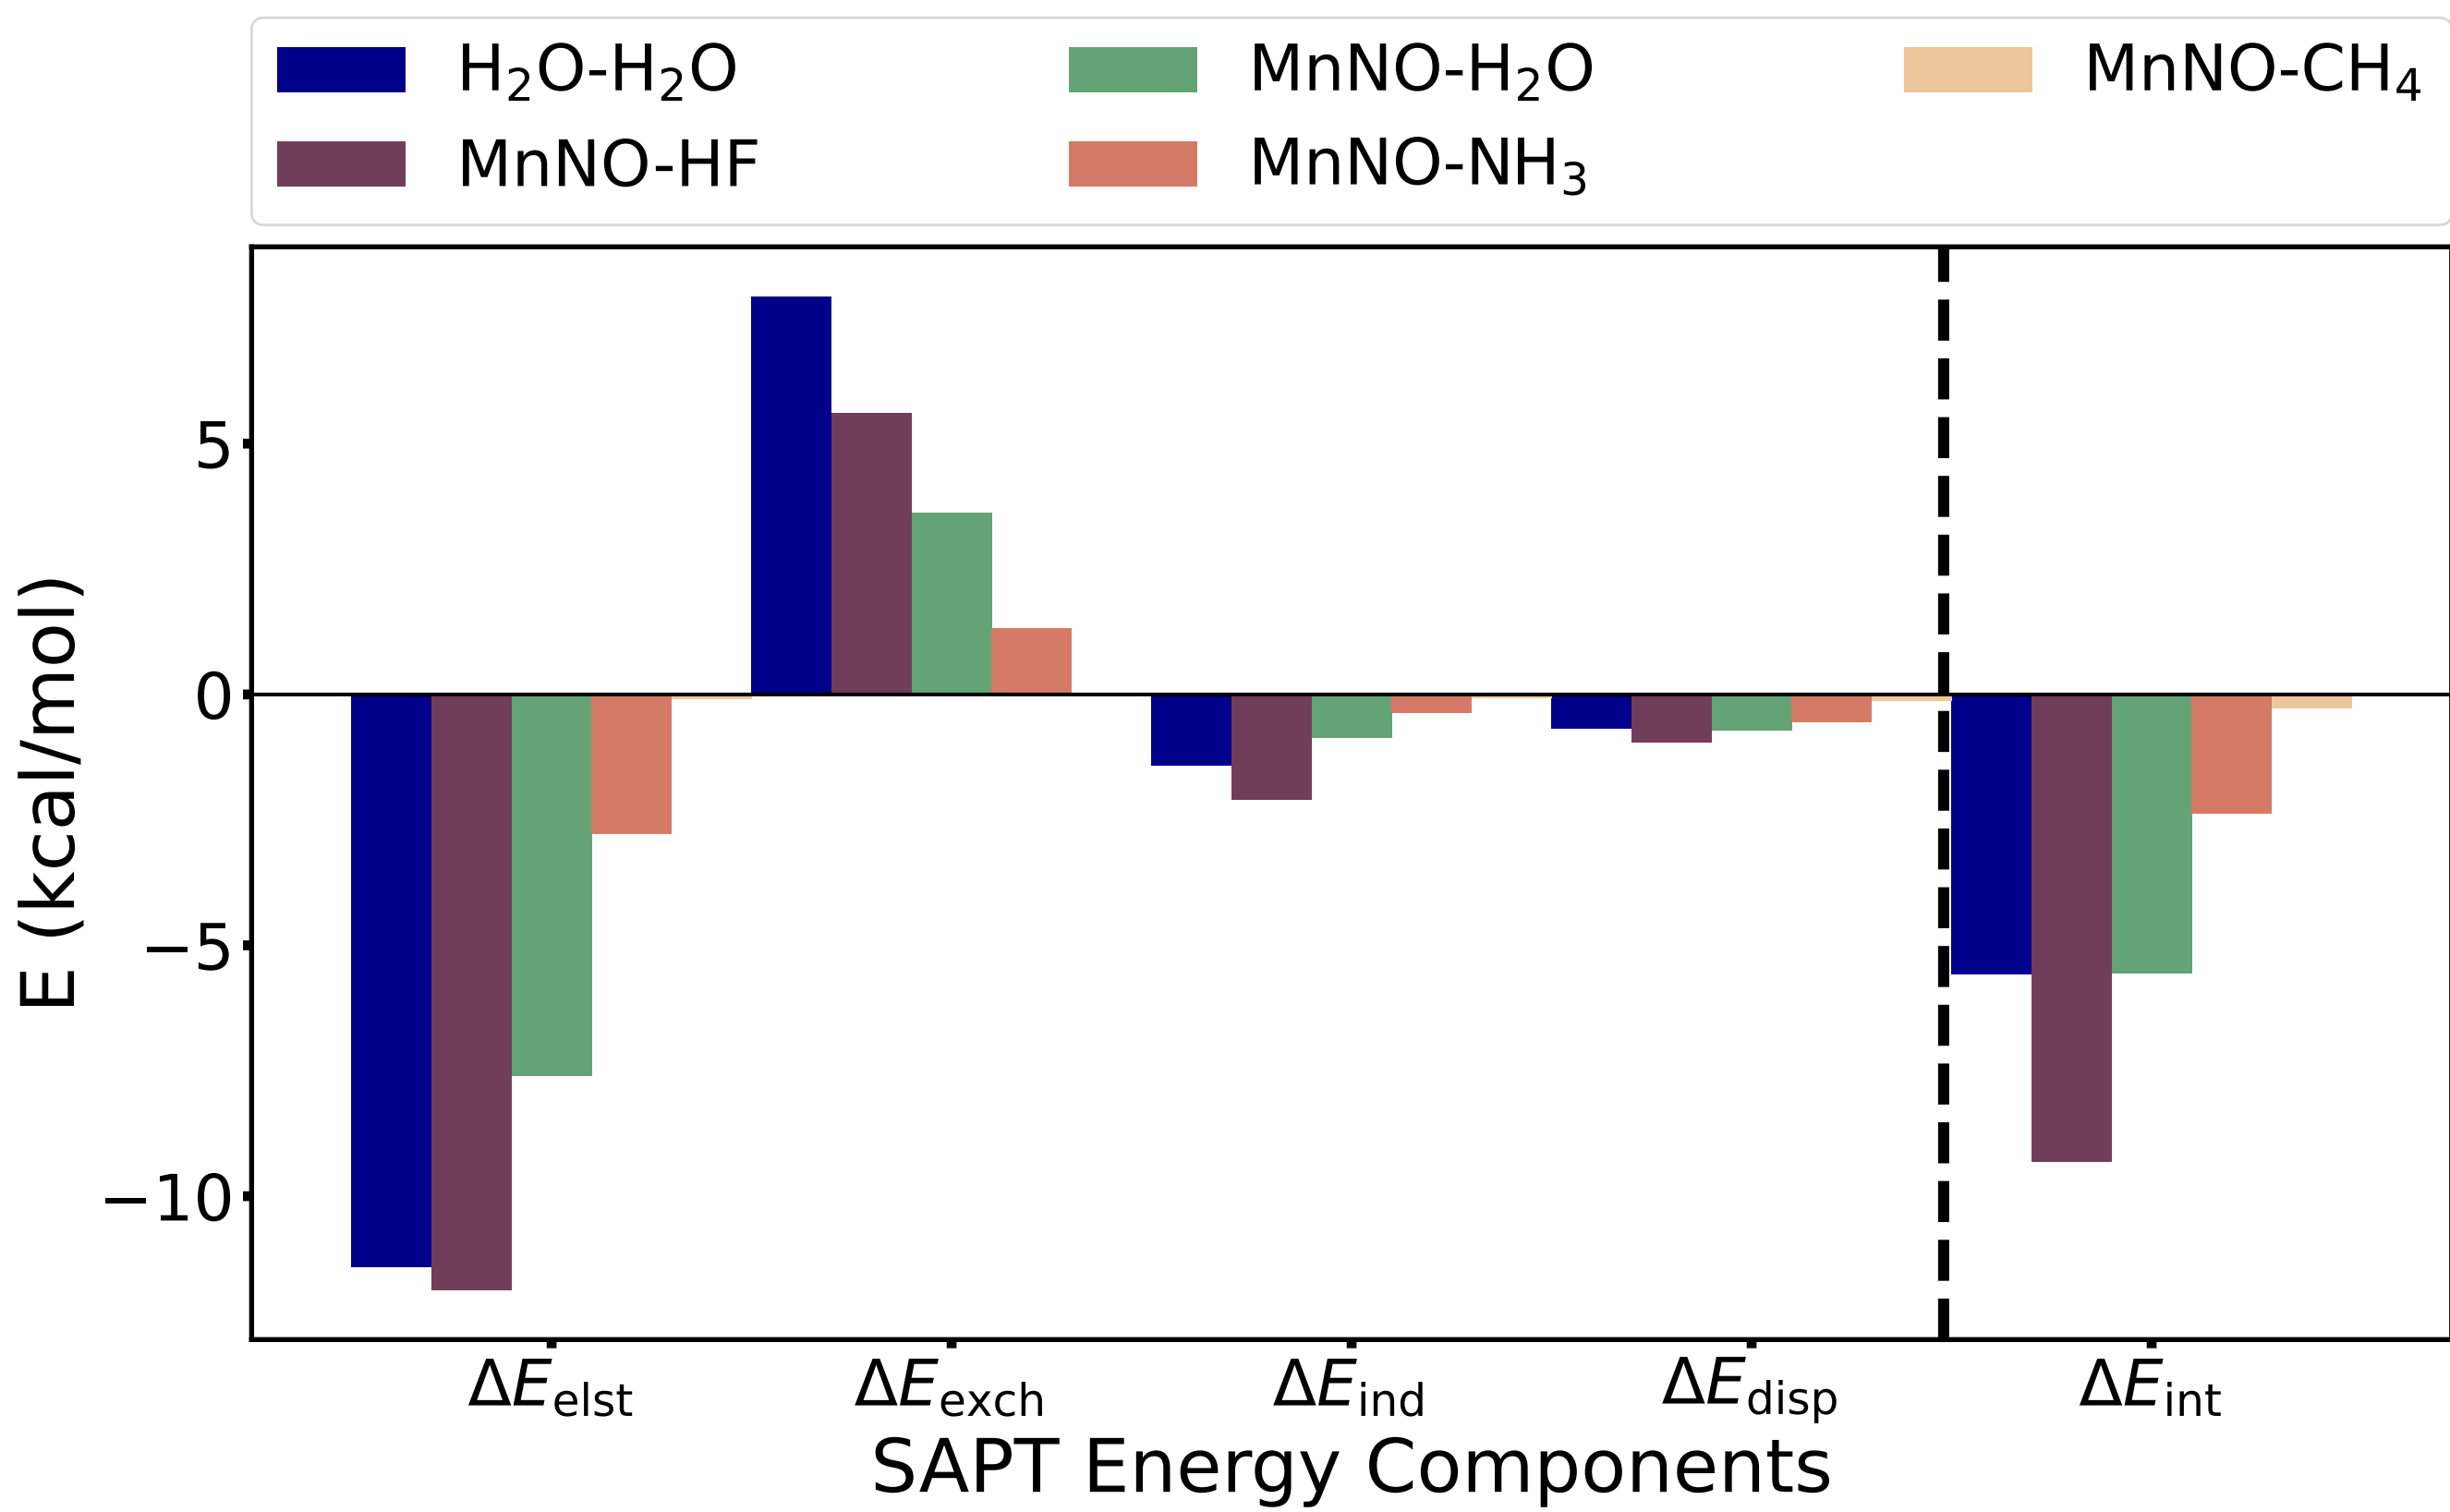

Supplement: d2sc05896k1.zip [file d2sc05896k1.zip]

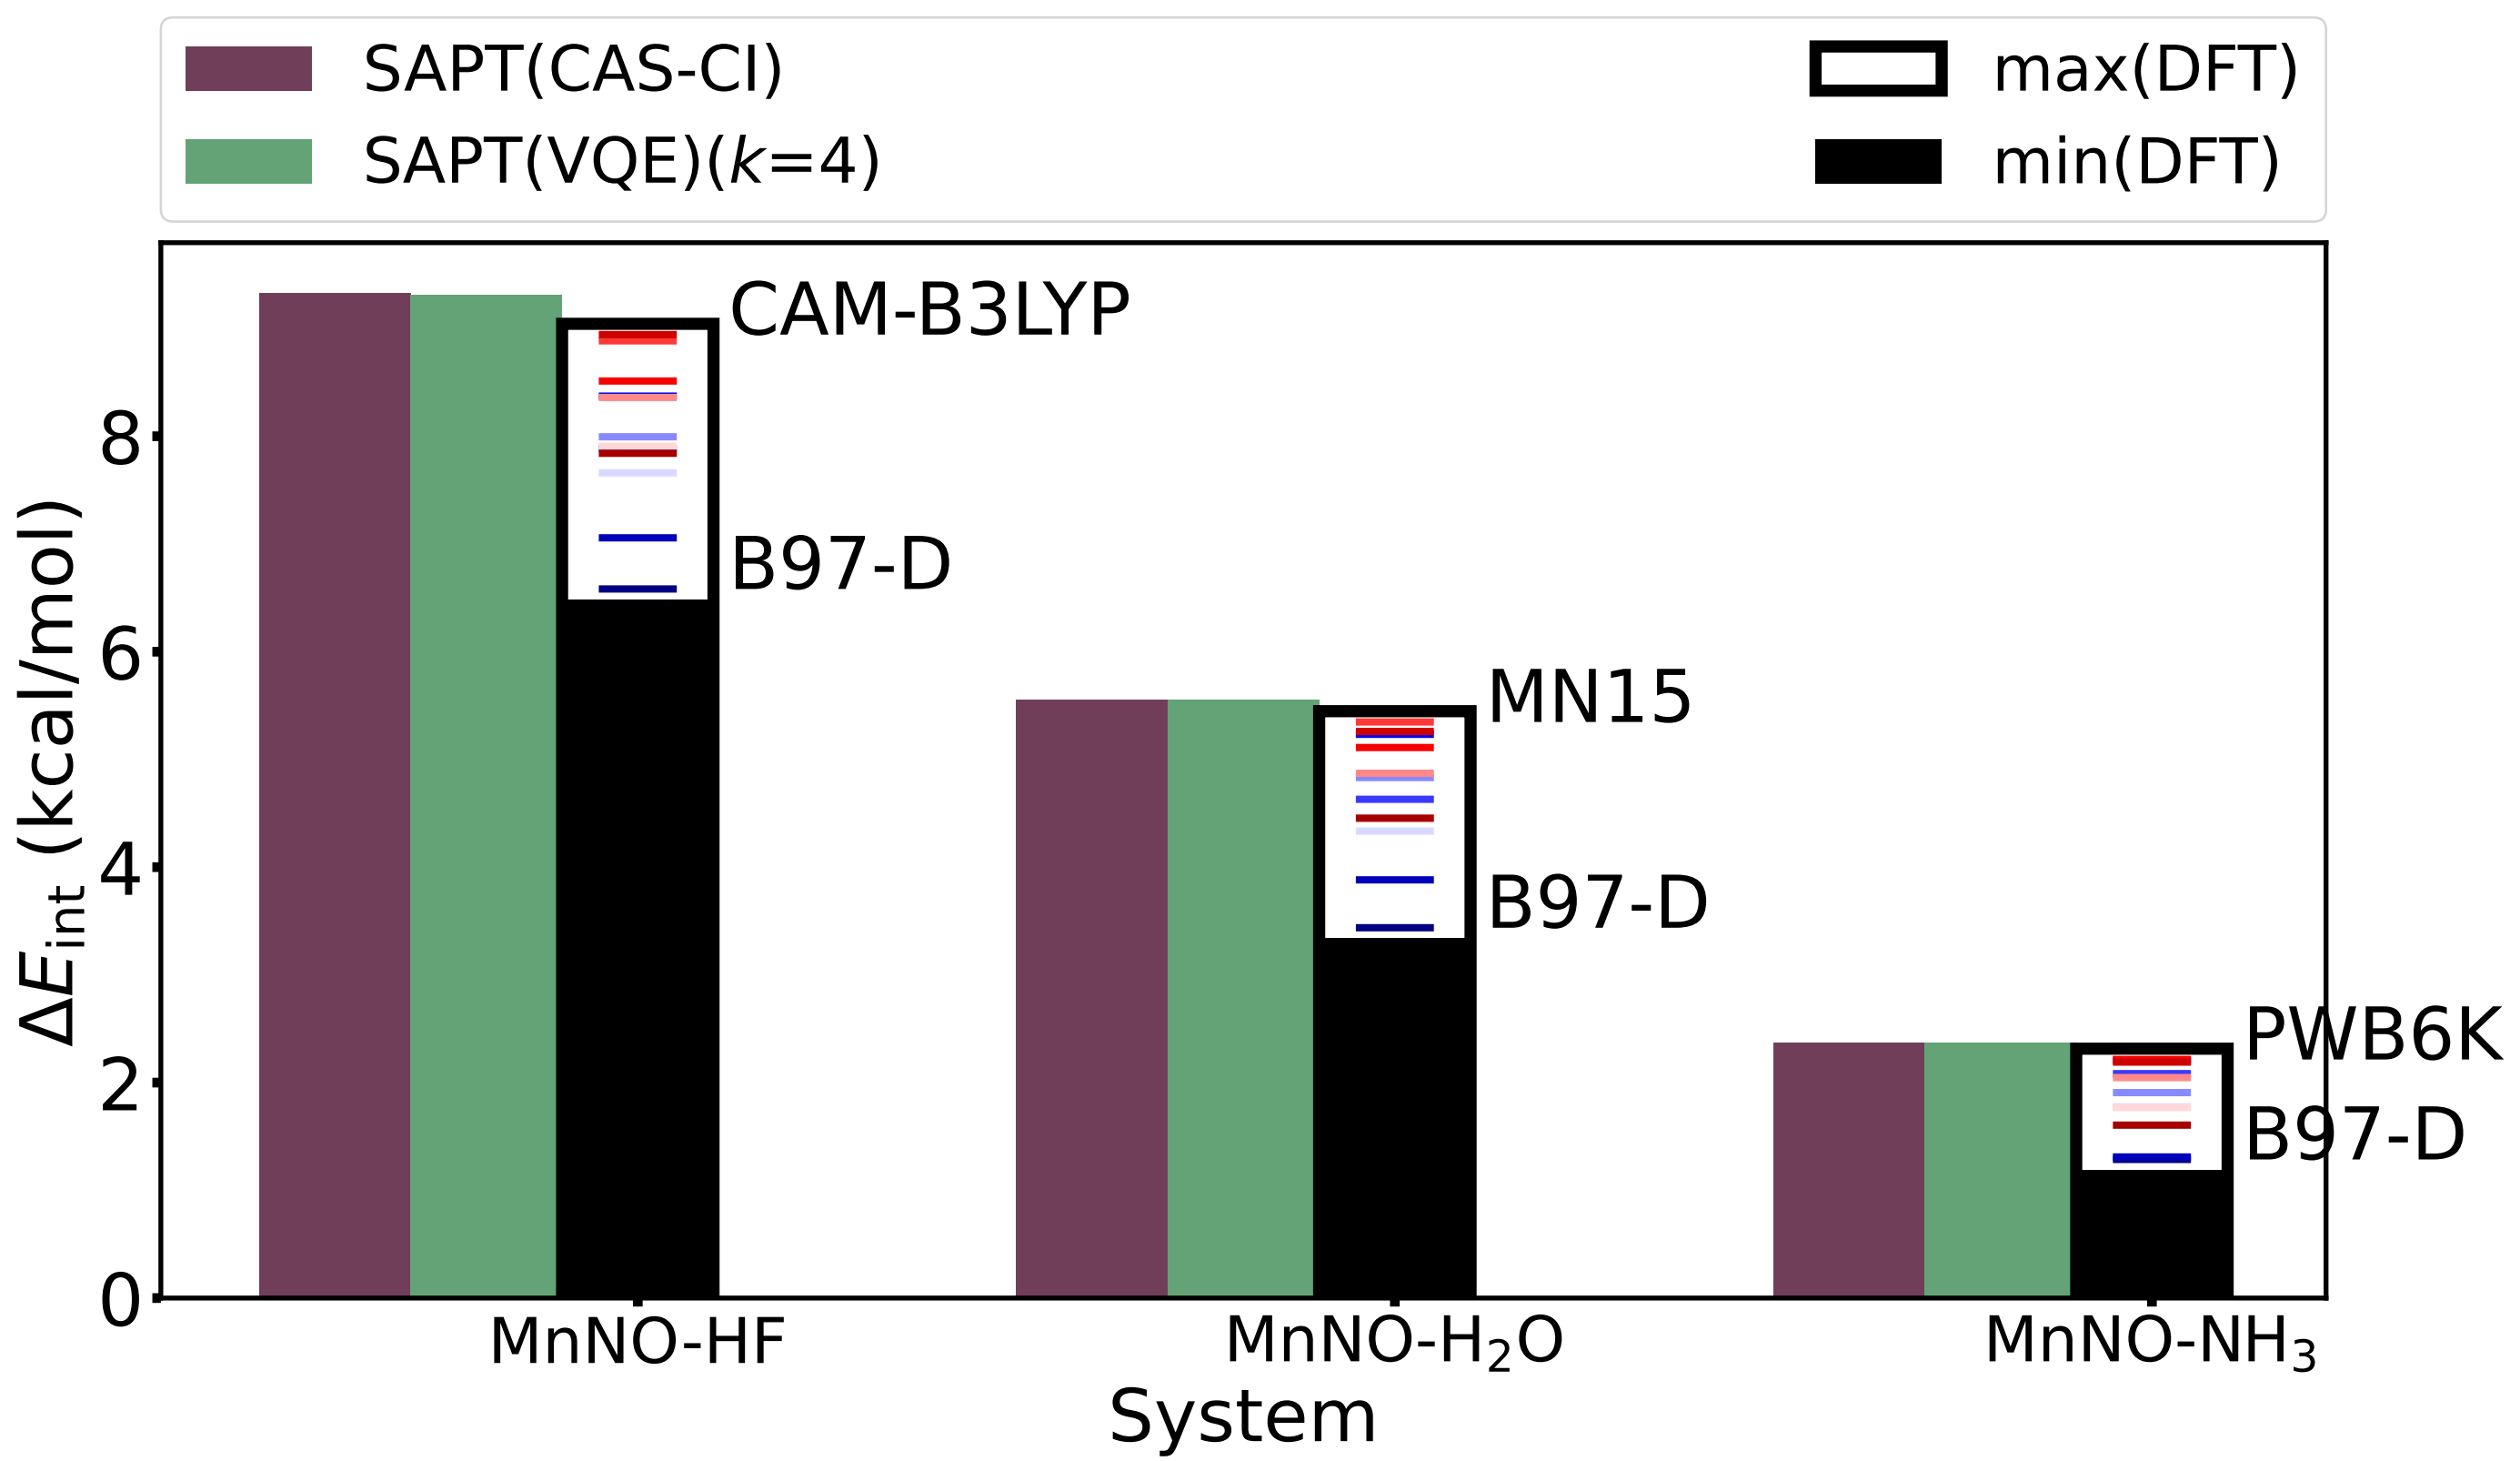

Supplement: d2sc05896k1.zip [file d2sc05896k1.zip]

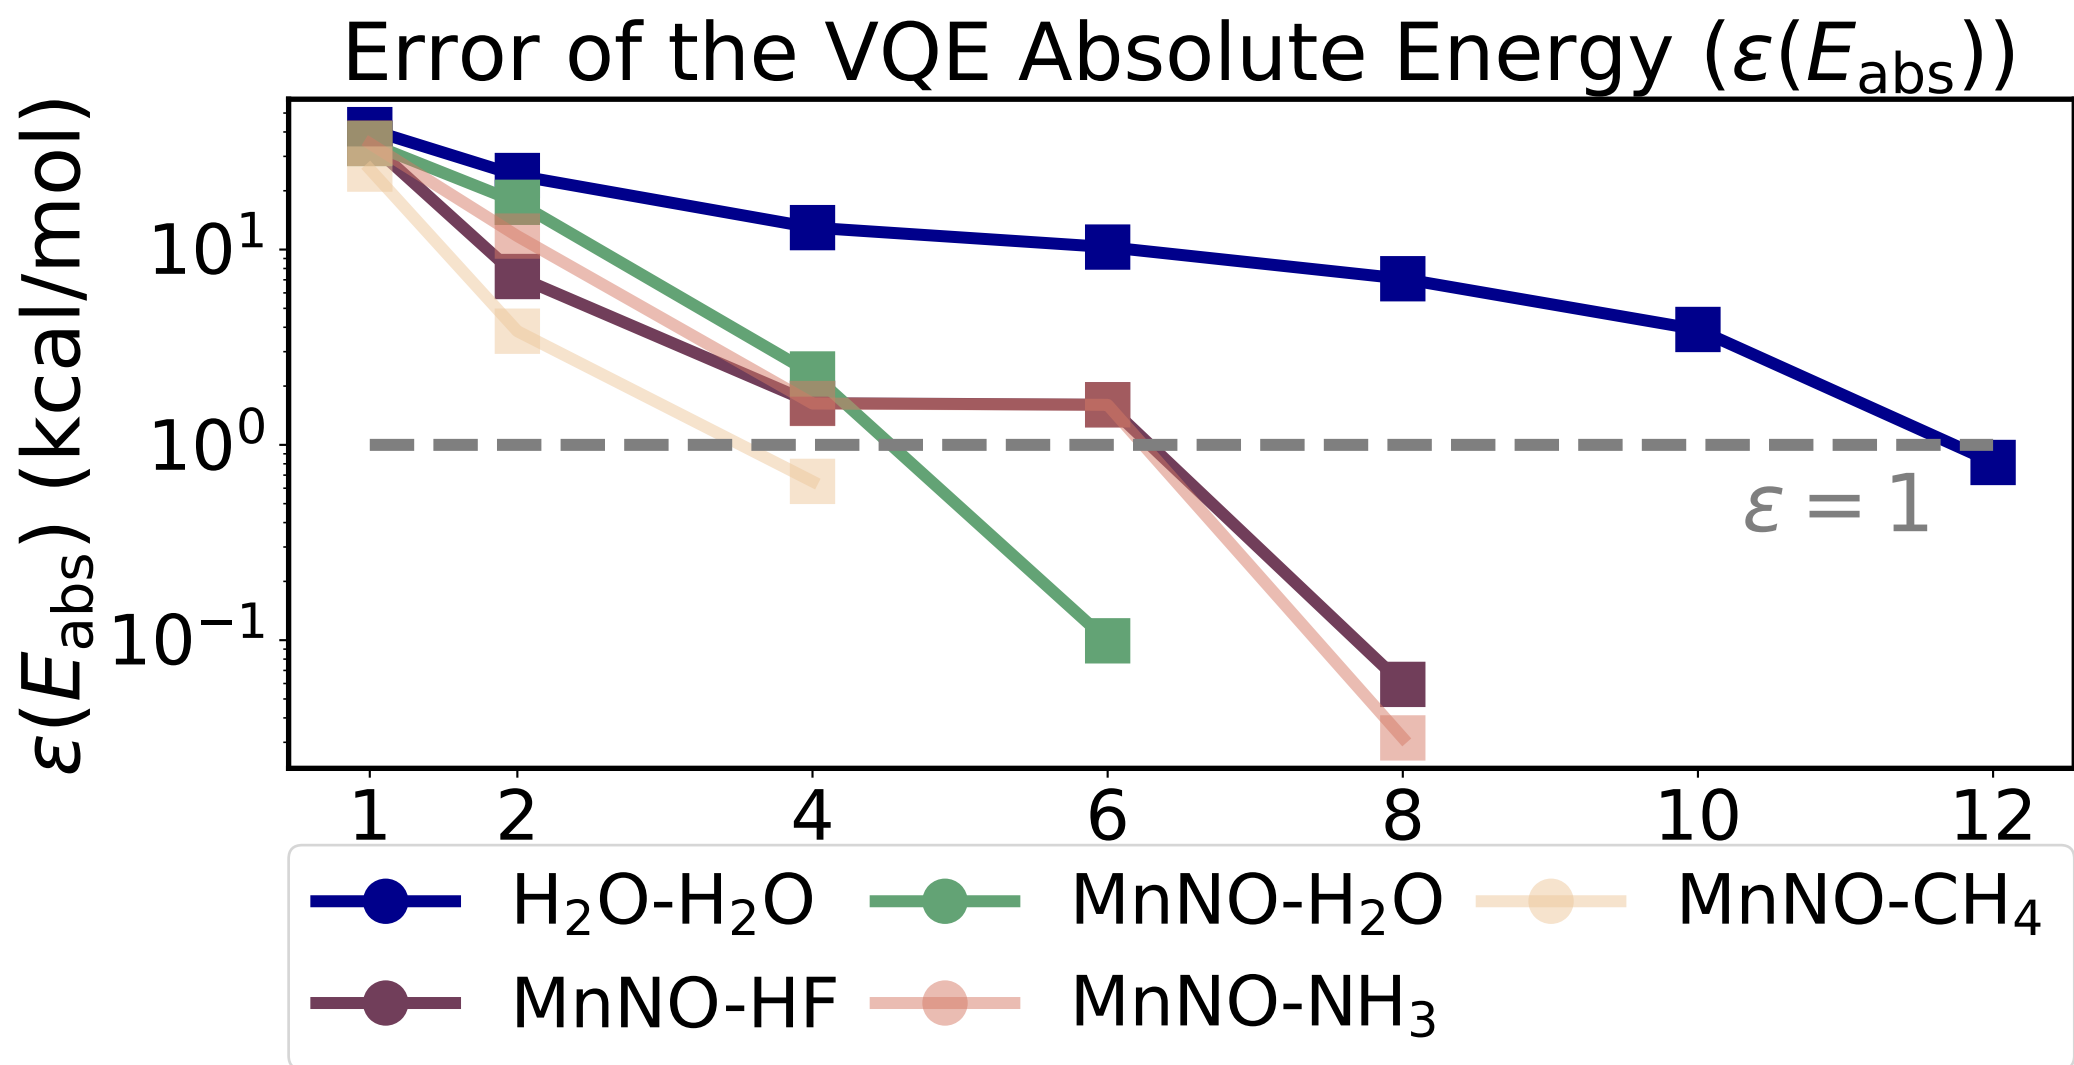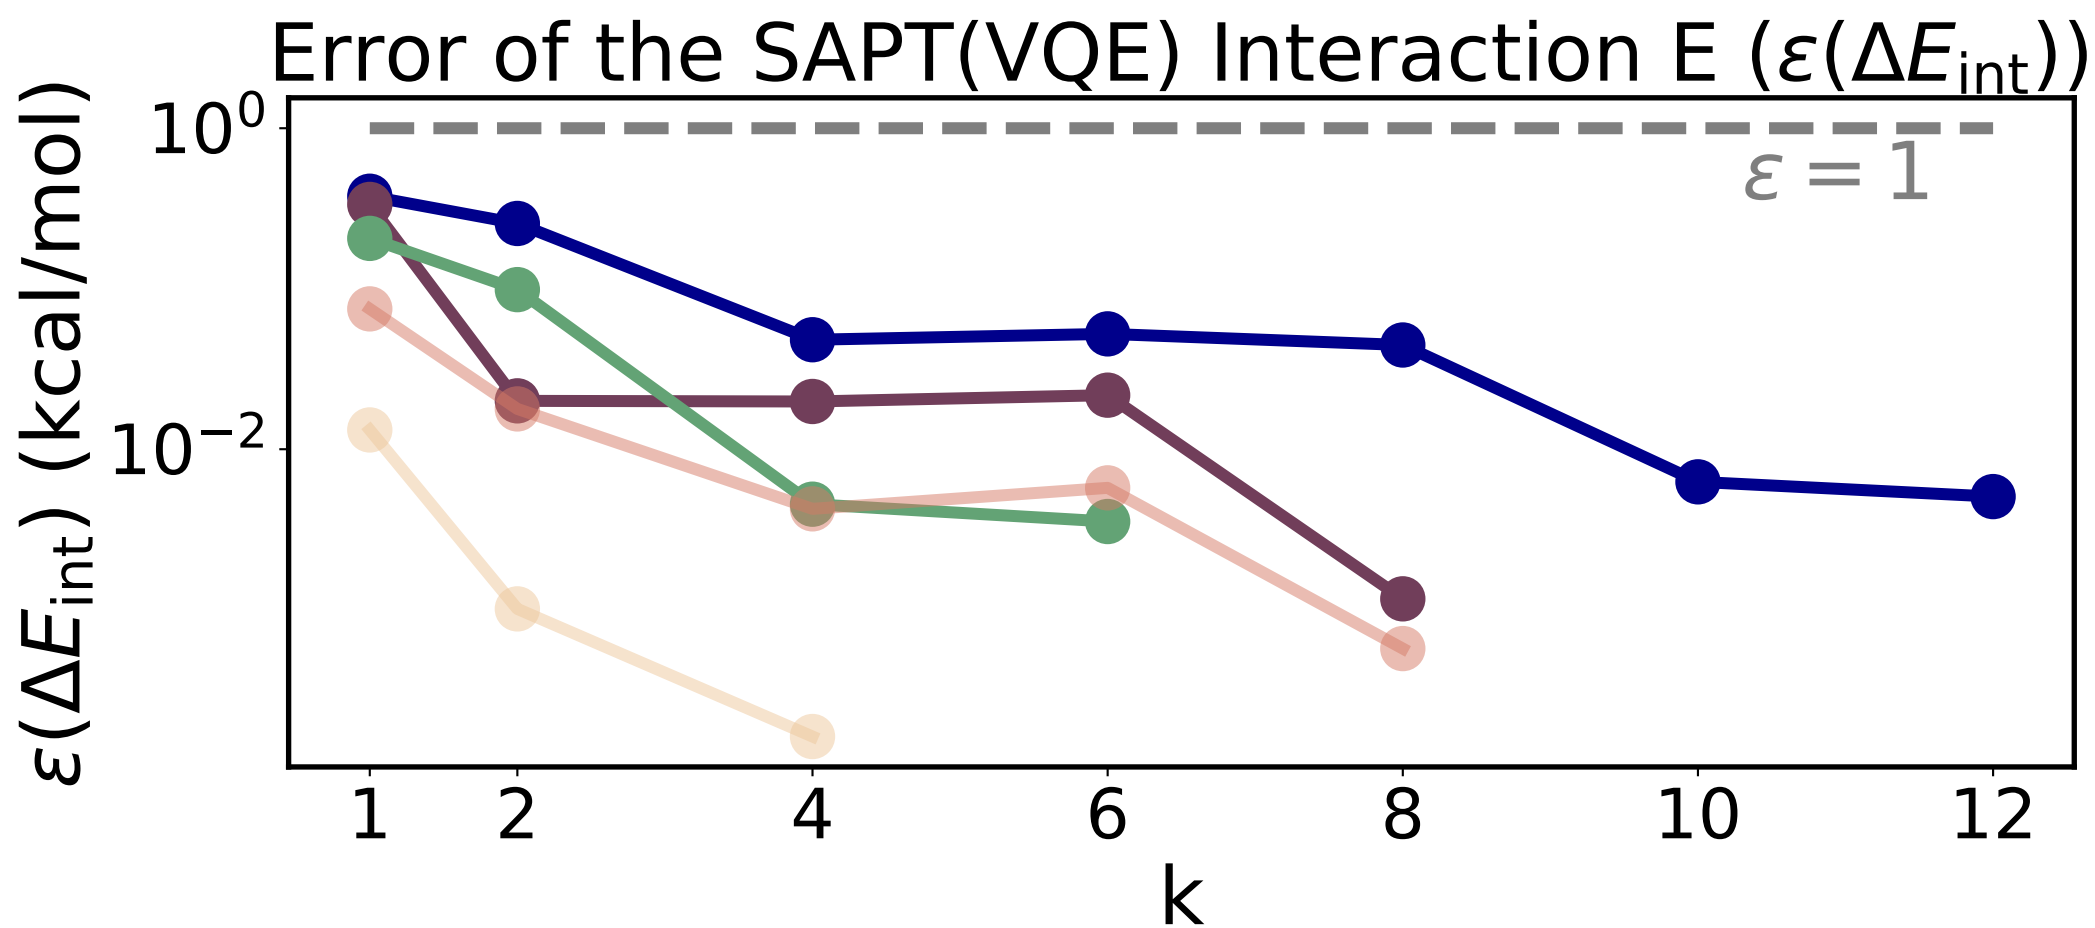

Supplement: d2sc05896k1.zip [file d2sc05896k1.zip]

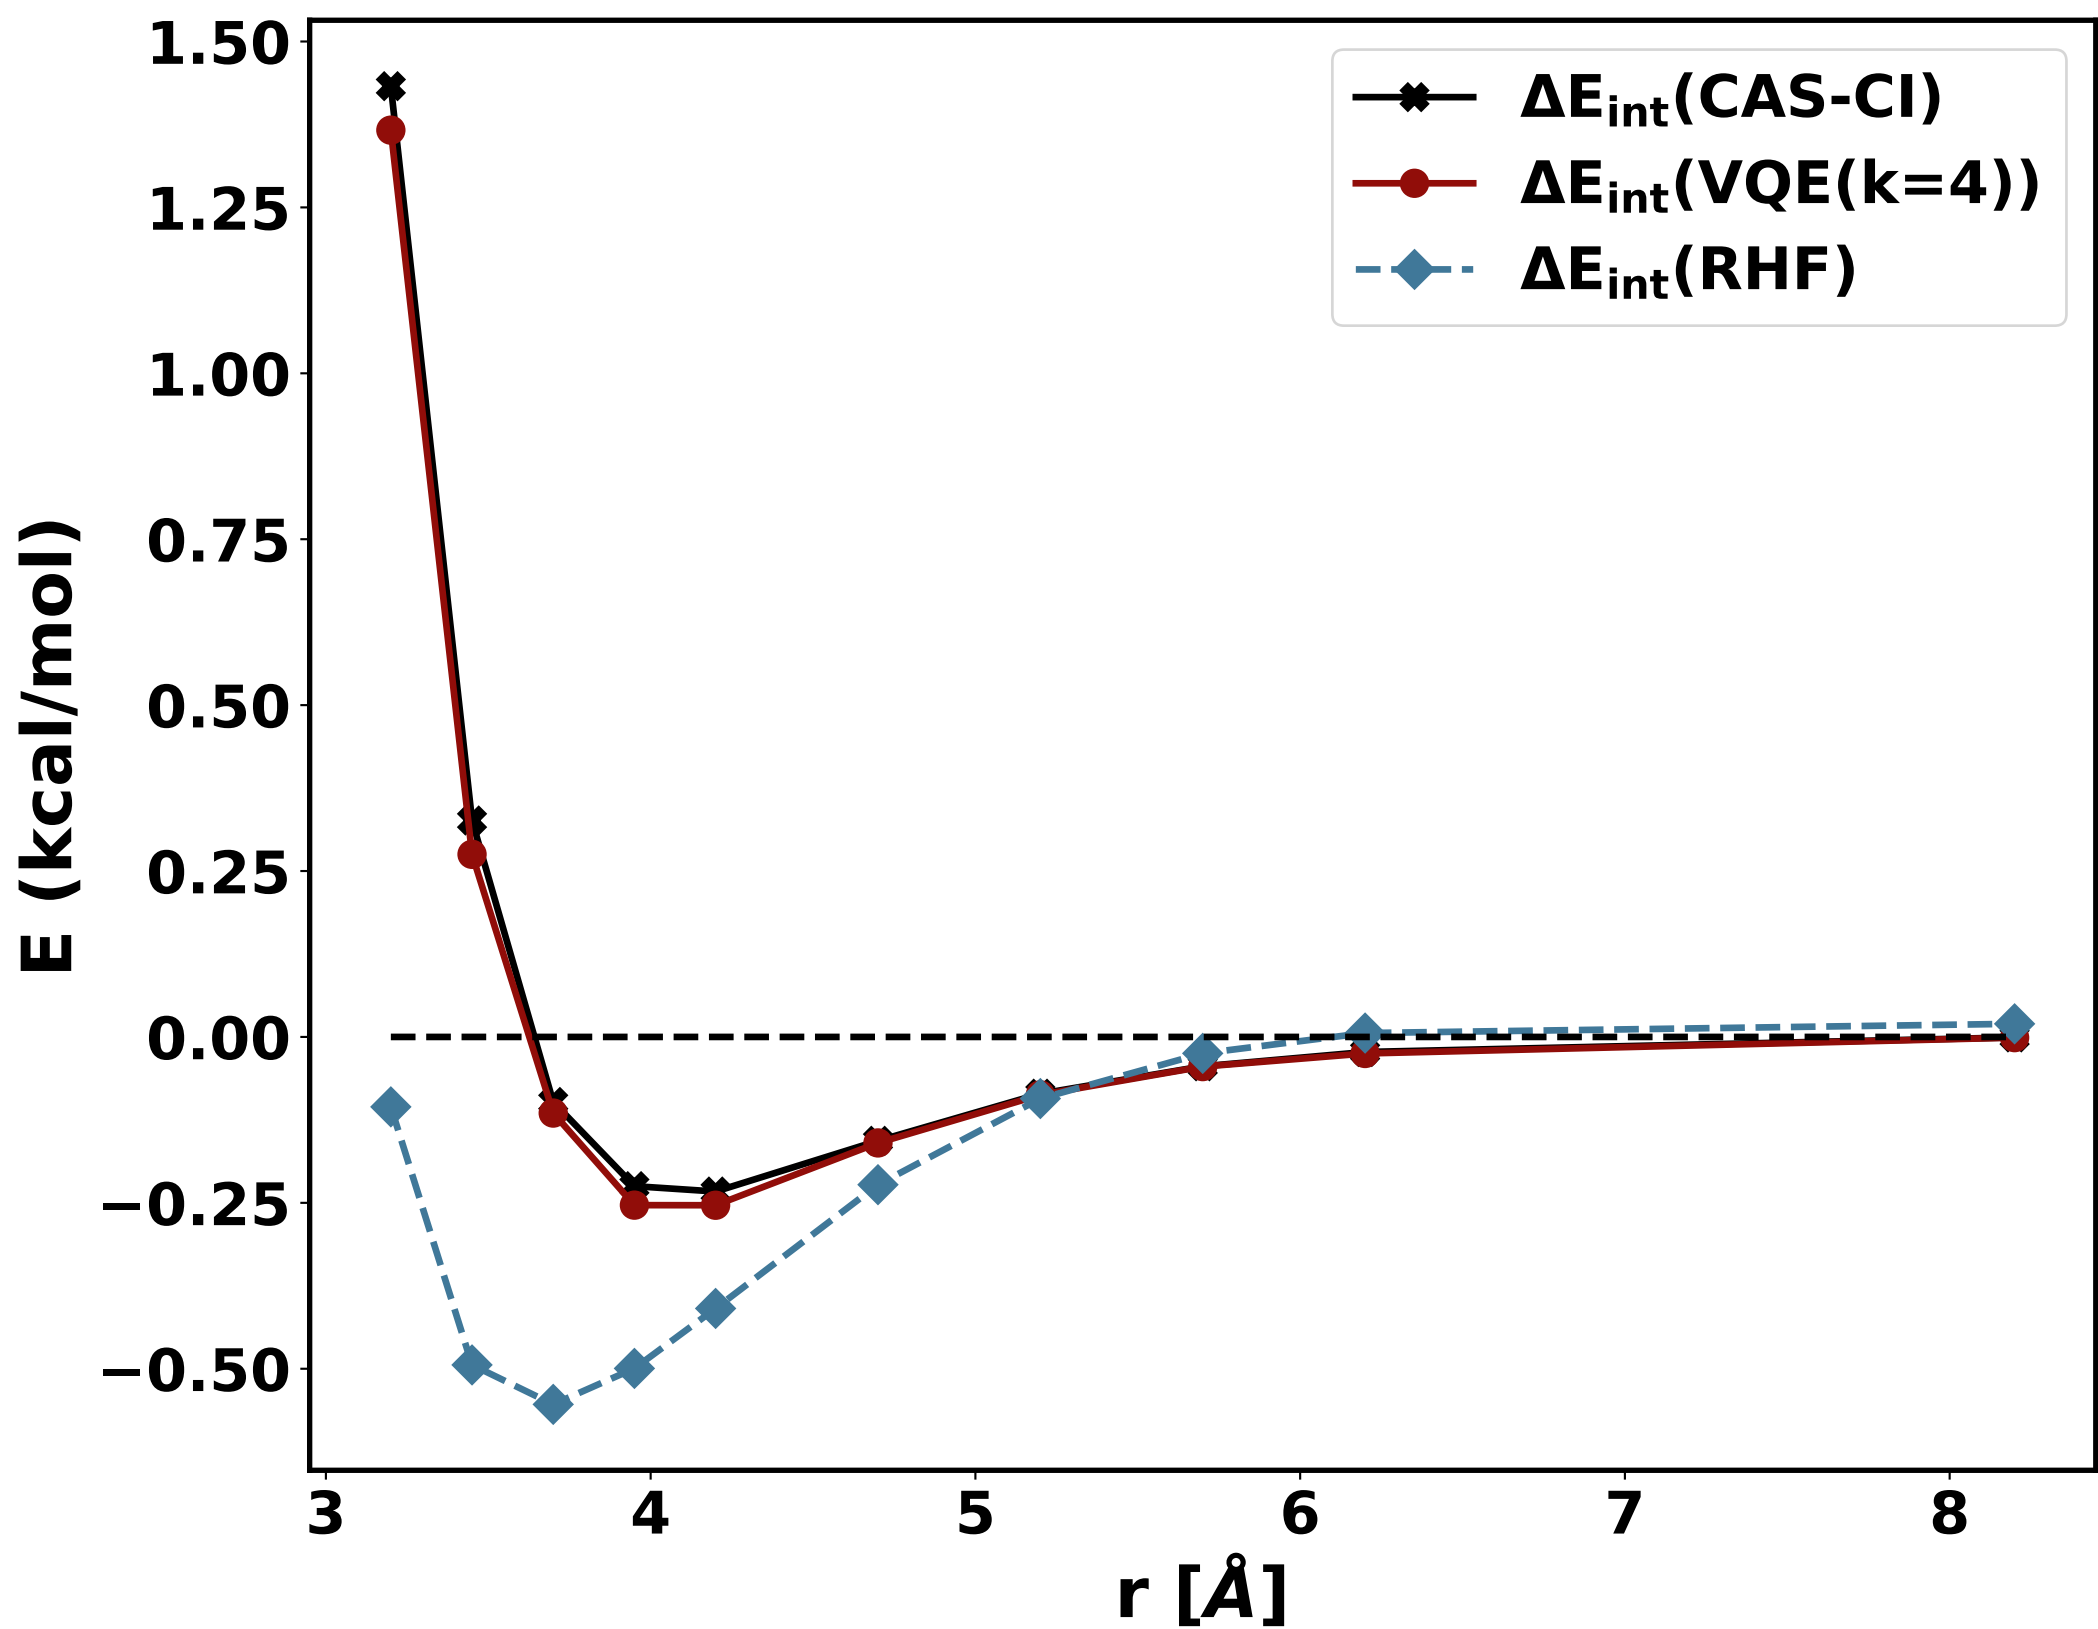

Supplement: d2sc05896k1.zip [file d2sc05896k1.zip]

Error  $\varepsilon$  (kcal/mol) H<sub>2</sub>O Dimer

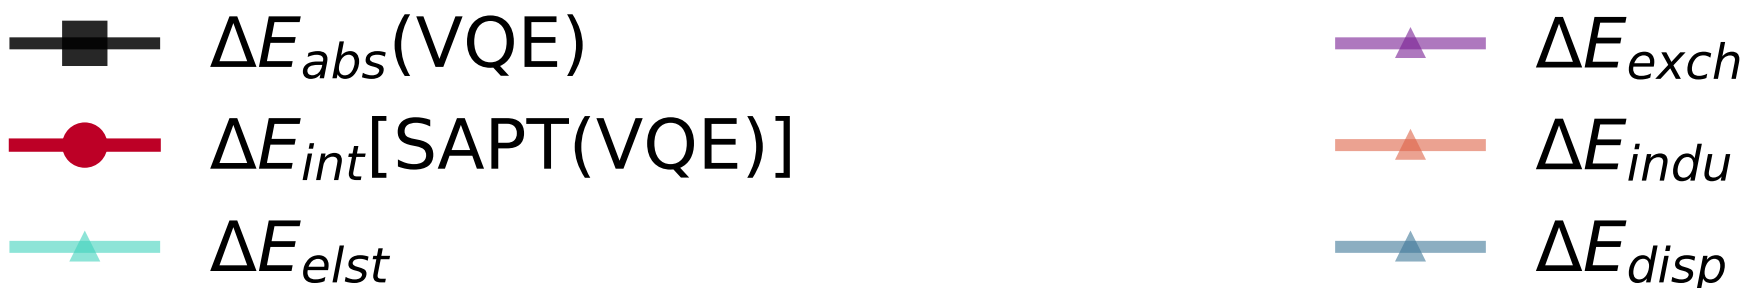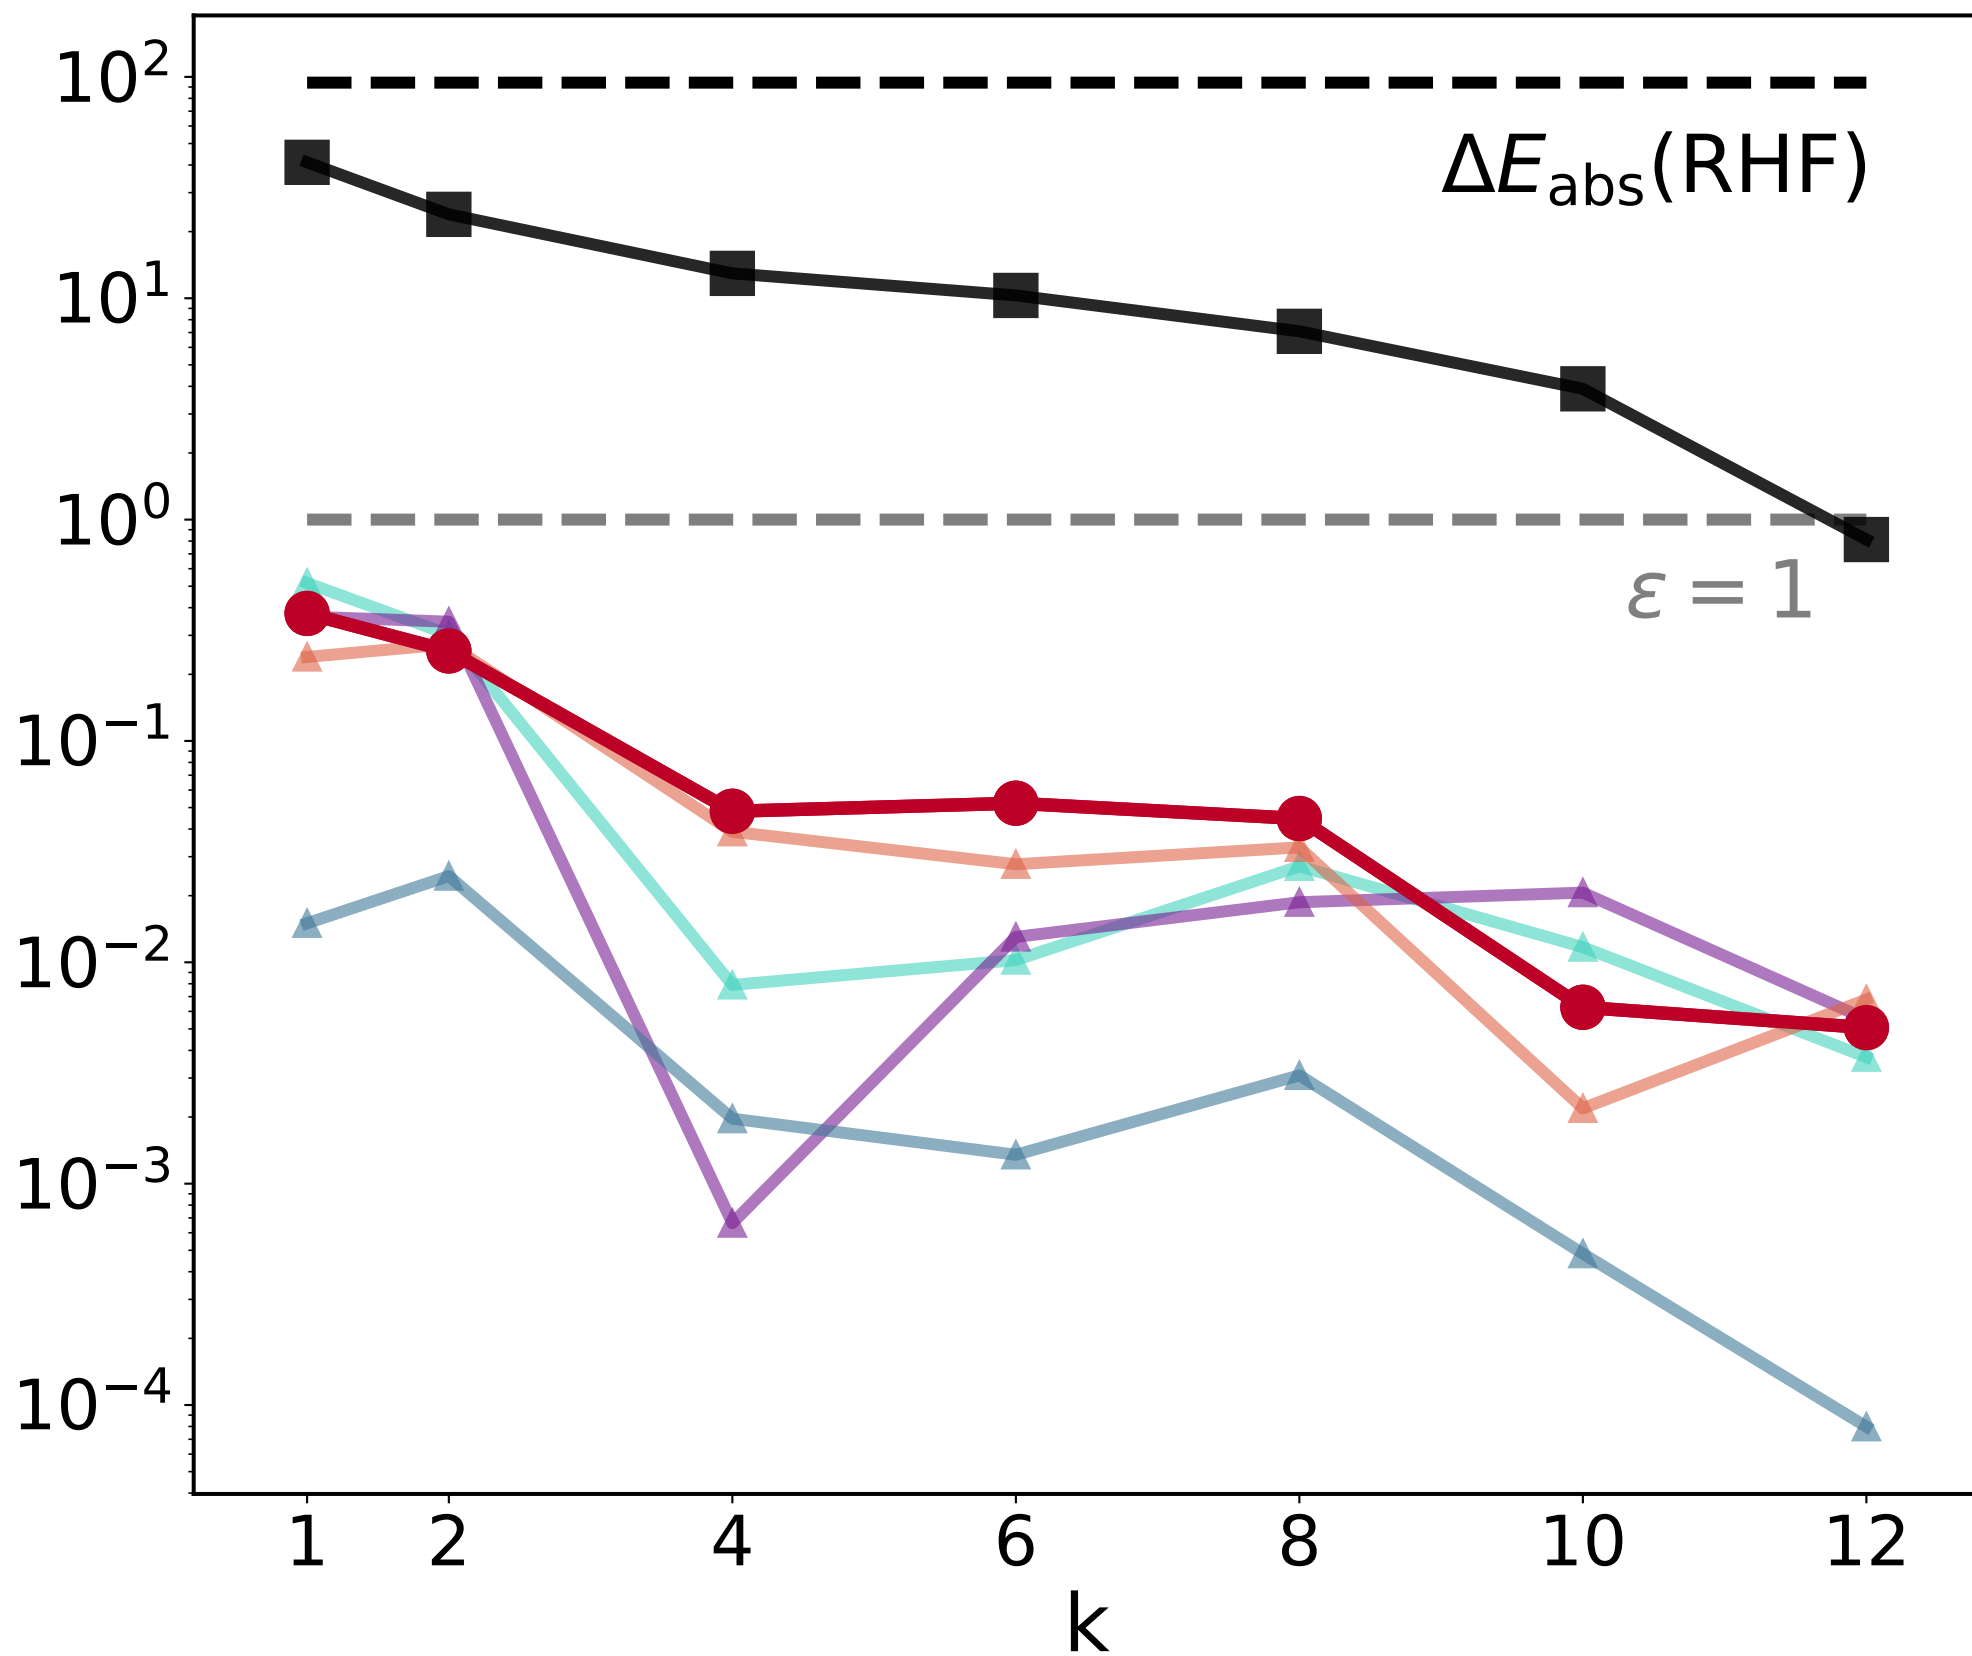

Supplement: d2sc05896k1.zip [file d2sc05896k1.zip]

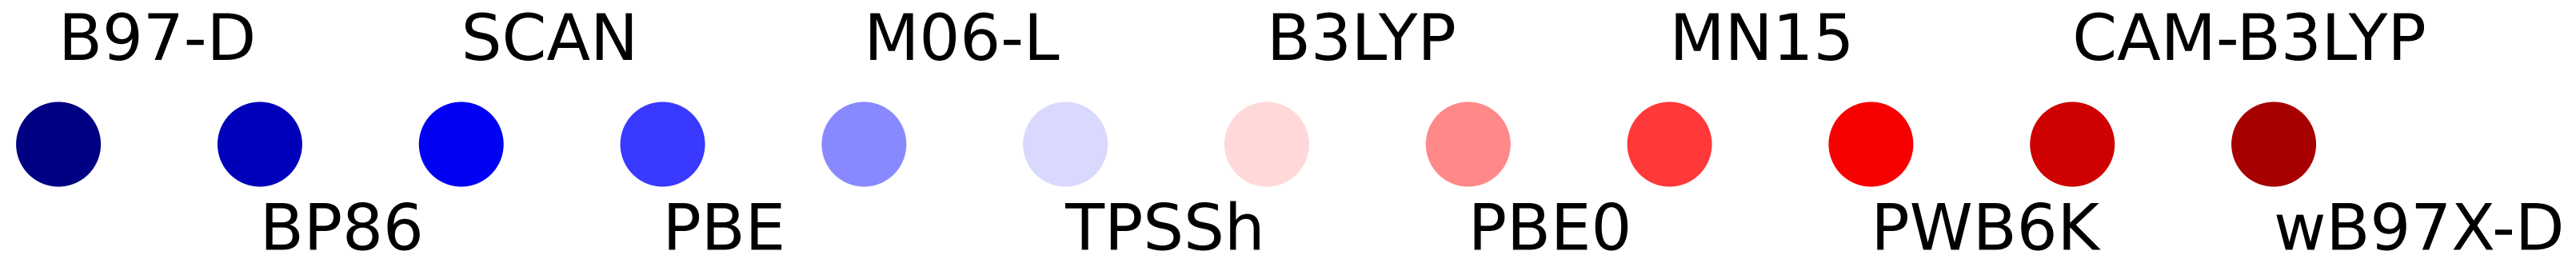

Supplement: d2sc05896k1.zip [file d2sc05896k1.zip]

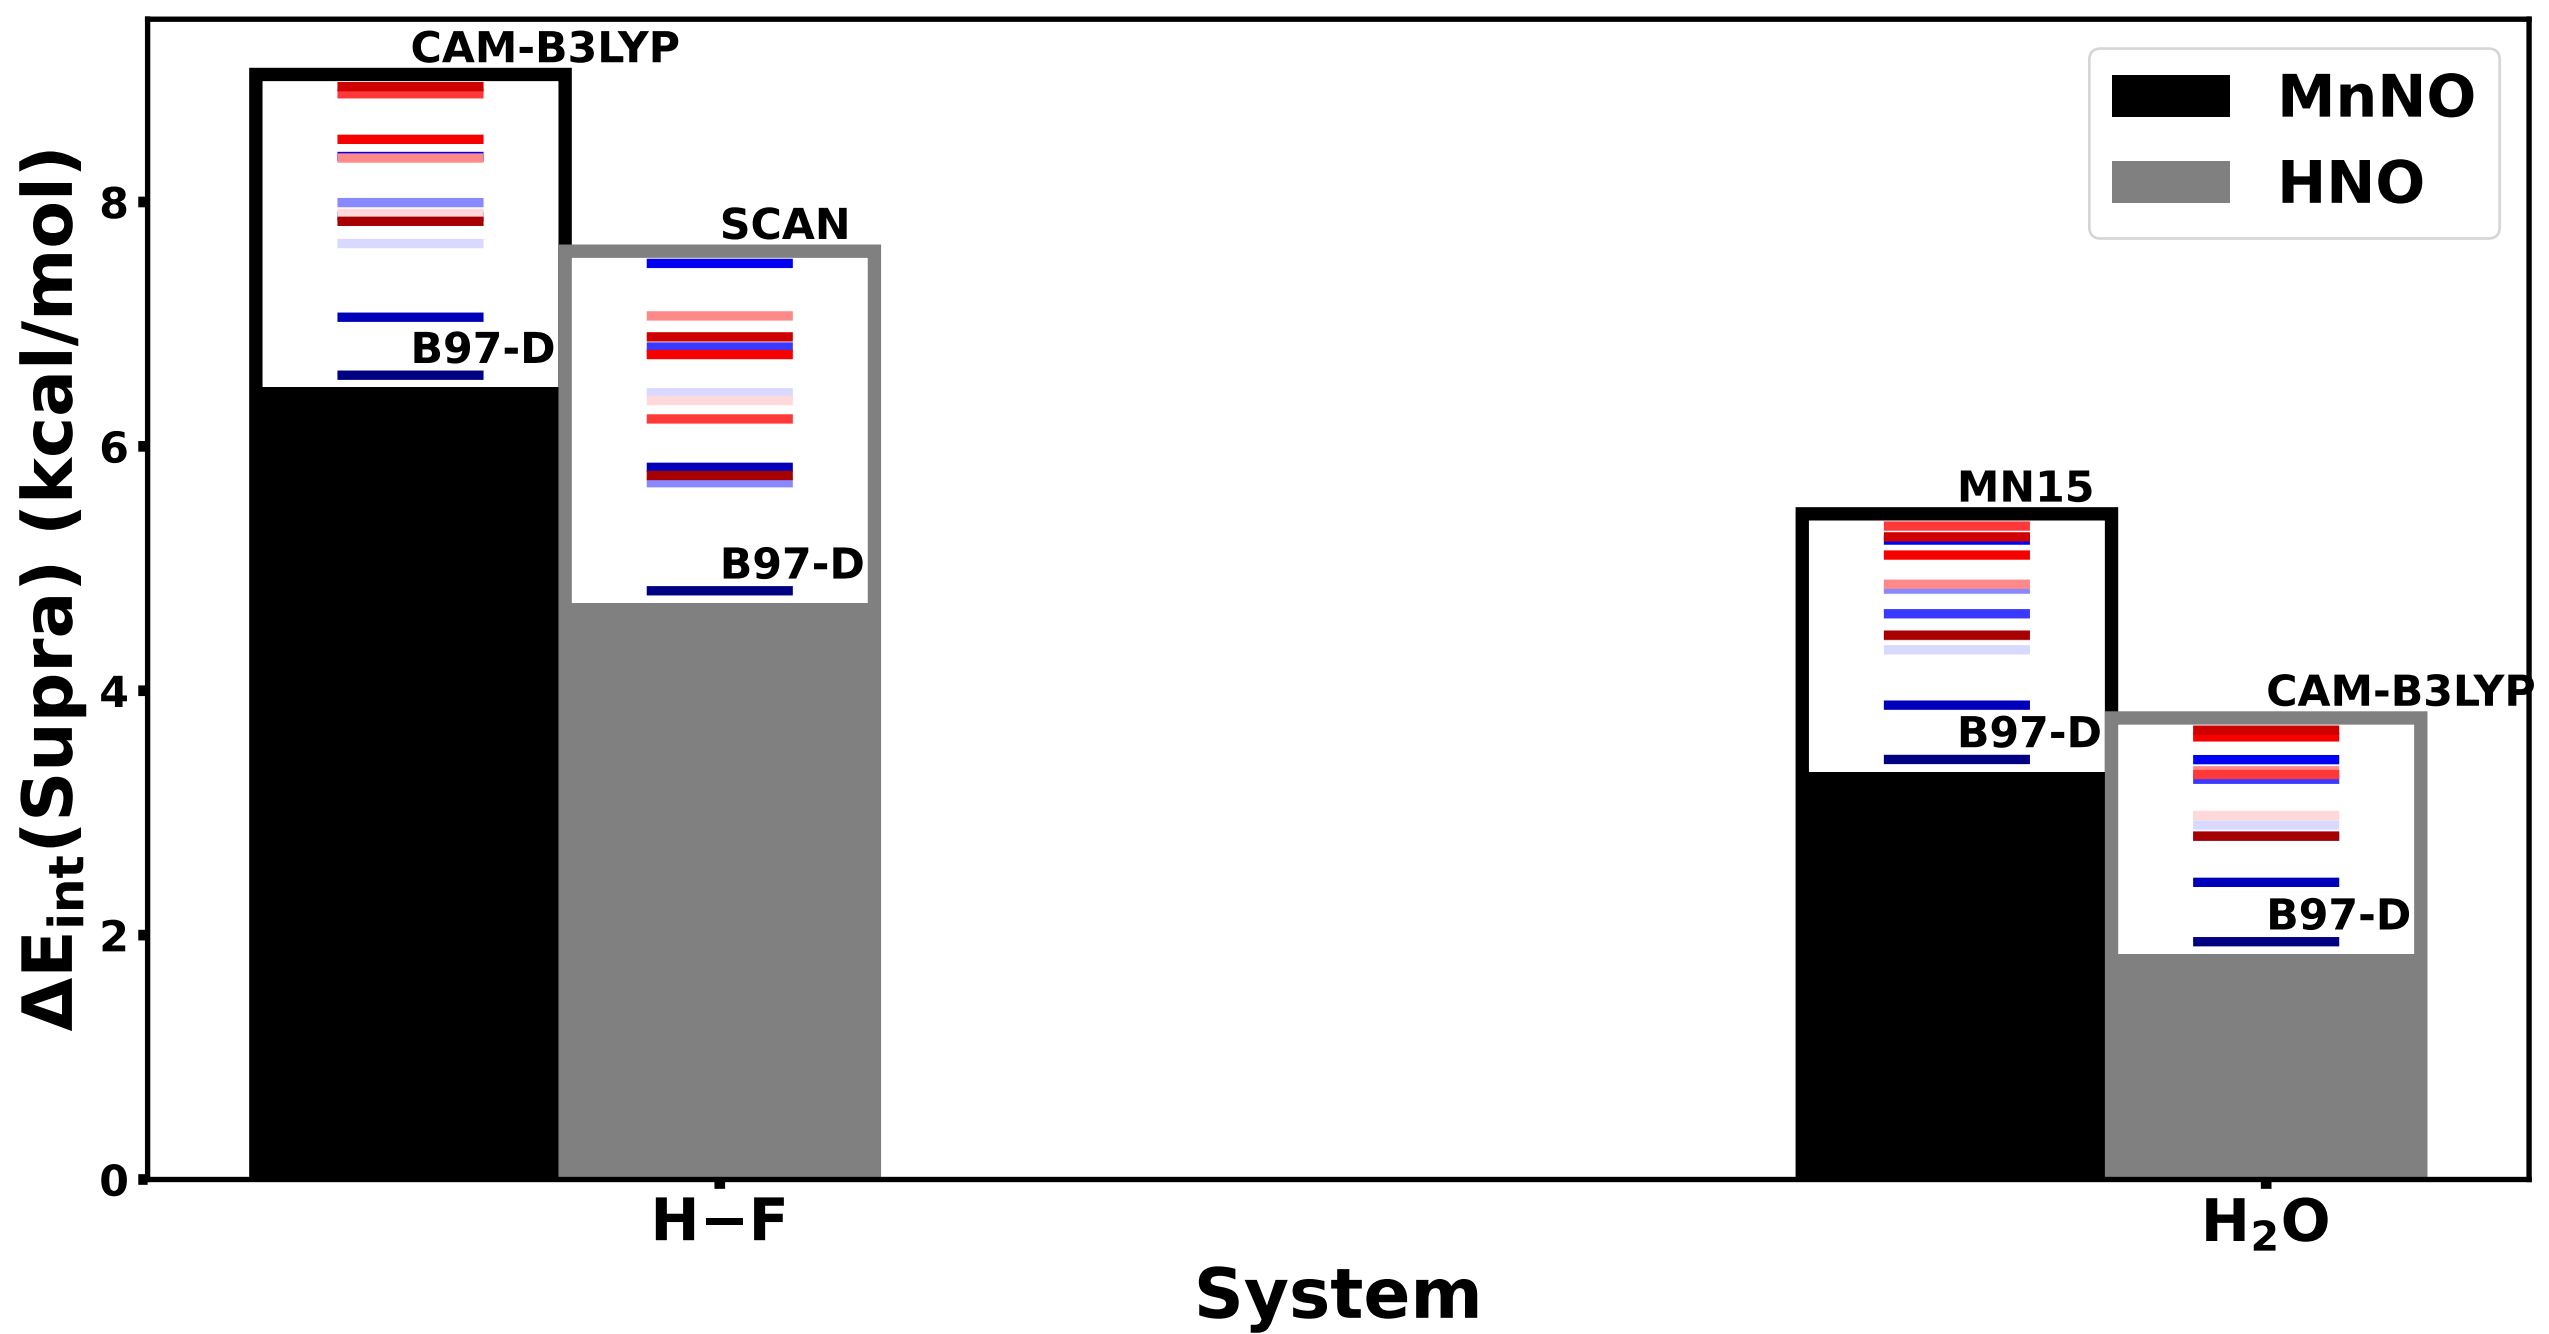

Supplement: d2sc05896k1.zip [file d2sc05896k1.zip]

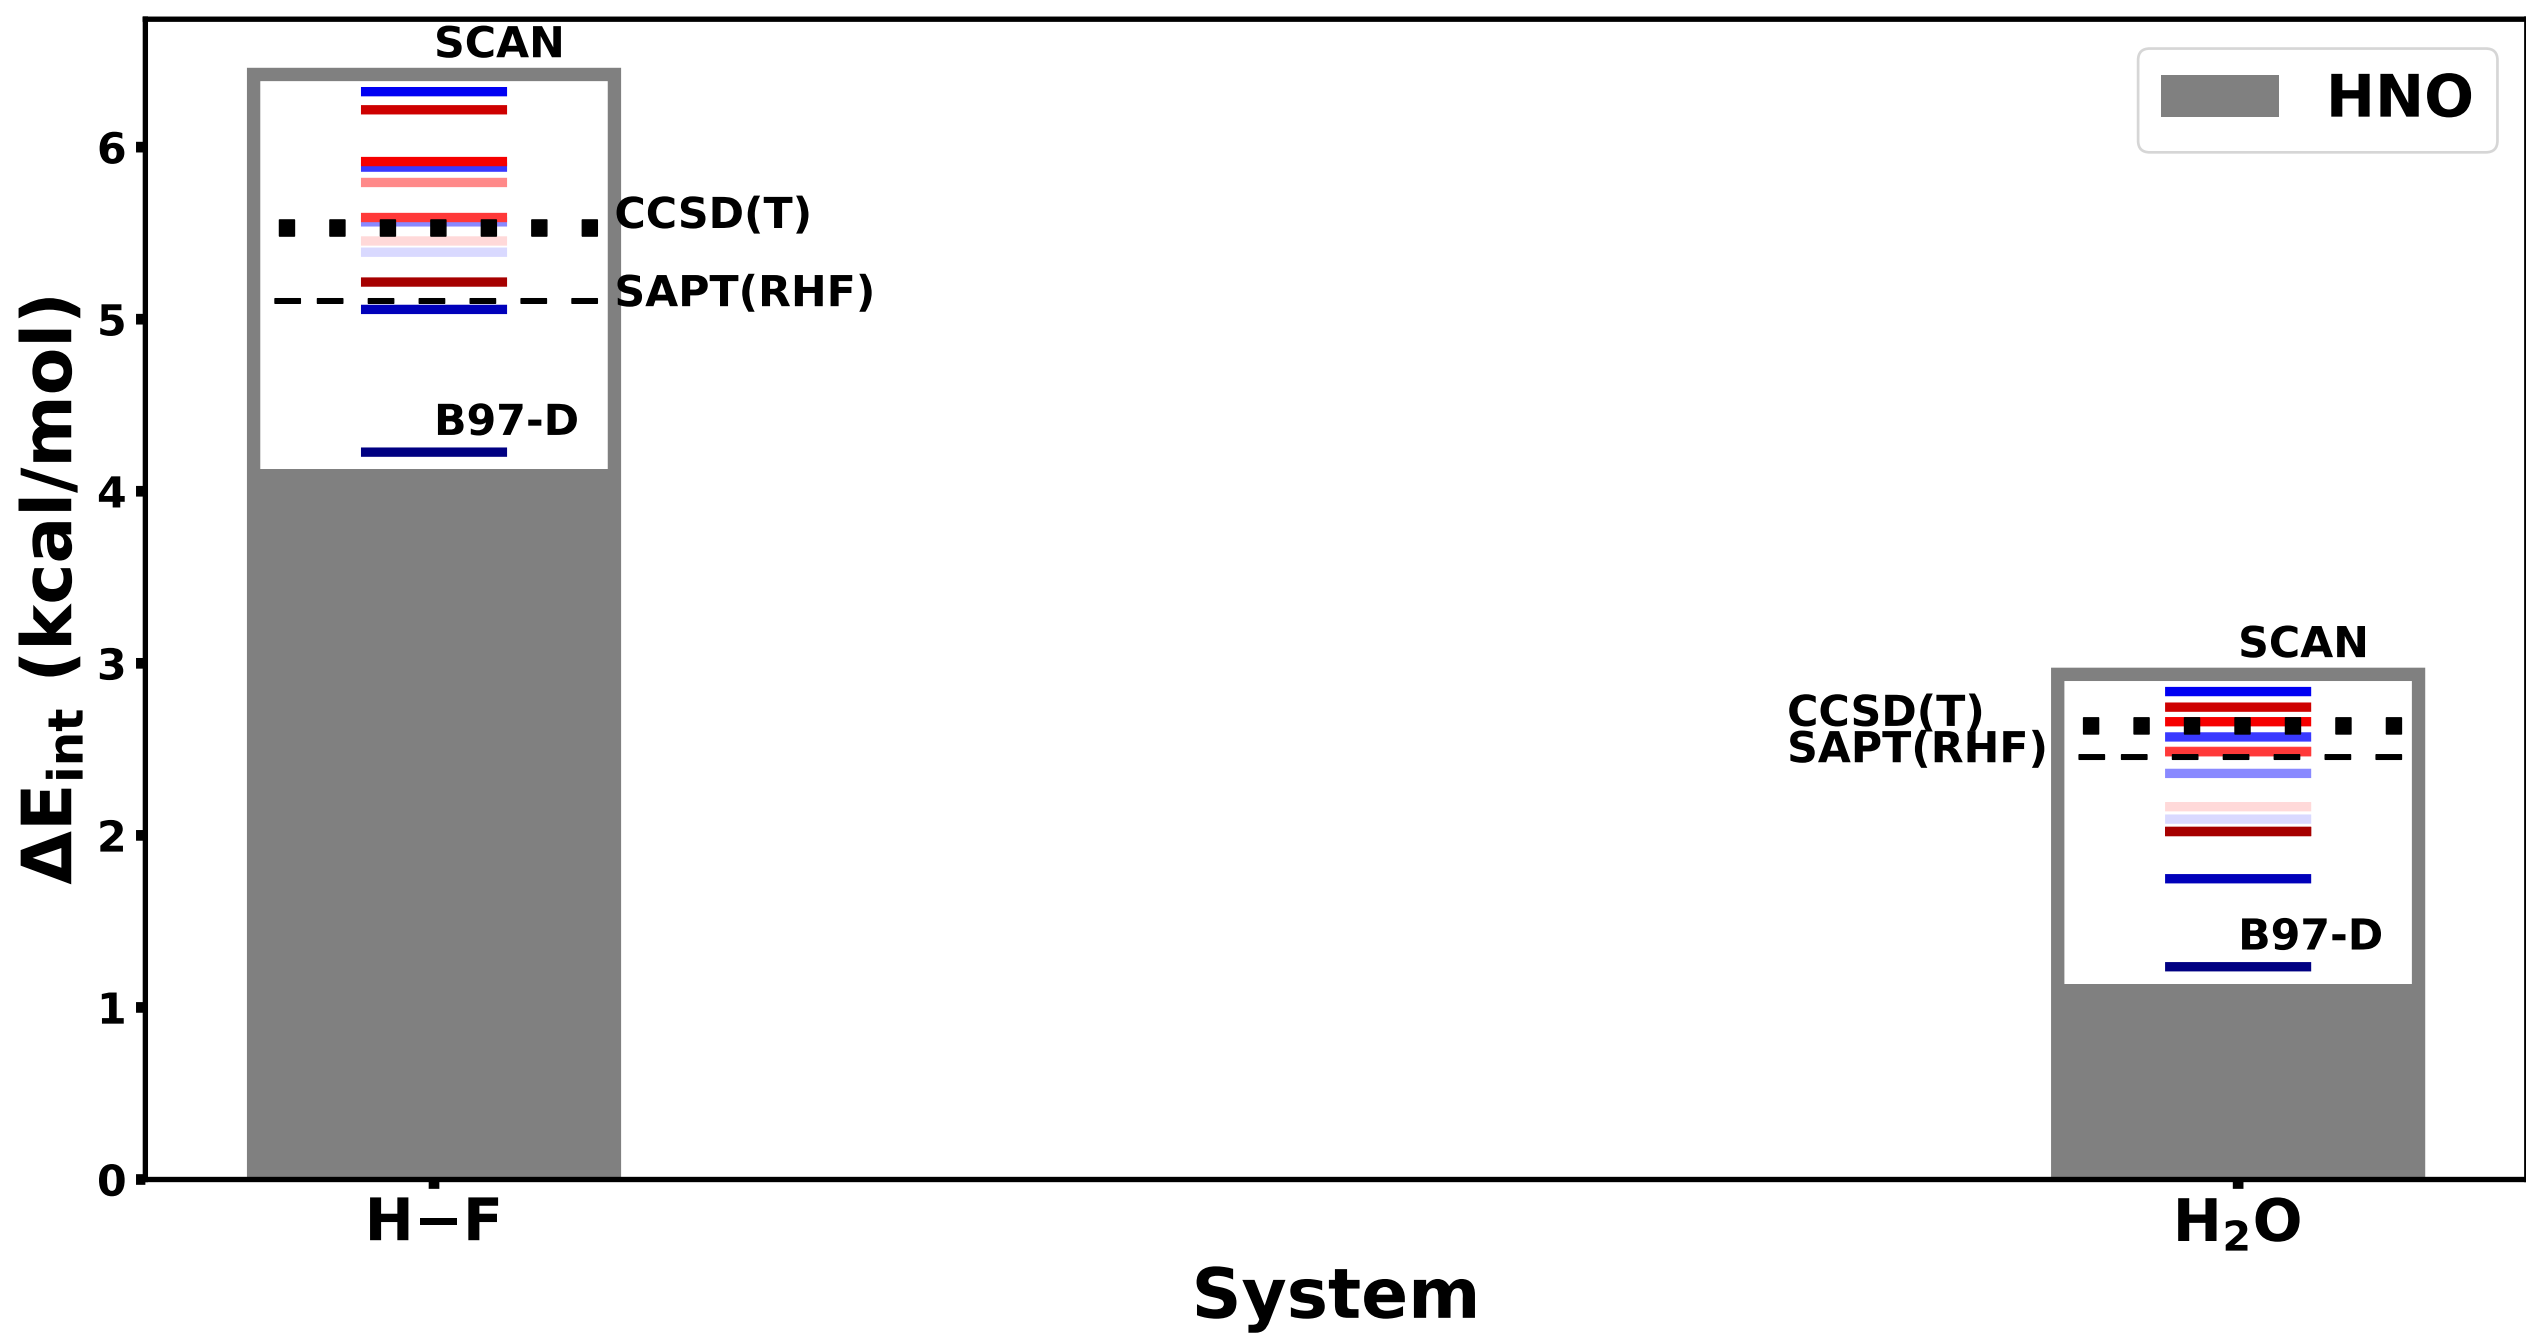

Supplement: d2sc05896k1.zip [file d2sc05896k1.zip]

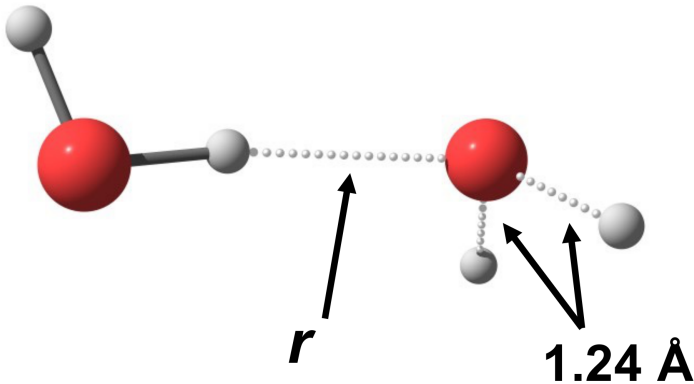

Supplement: d2sc05896k1.zip [file d2sc05896k1.zip]

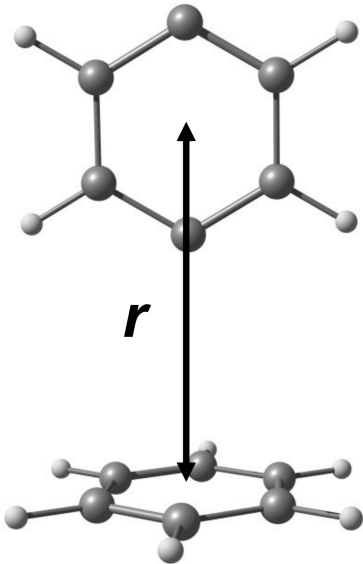

Supplement: d2sc05896k1.zip [file d2sc05896k1.zip]

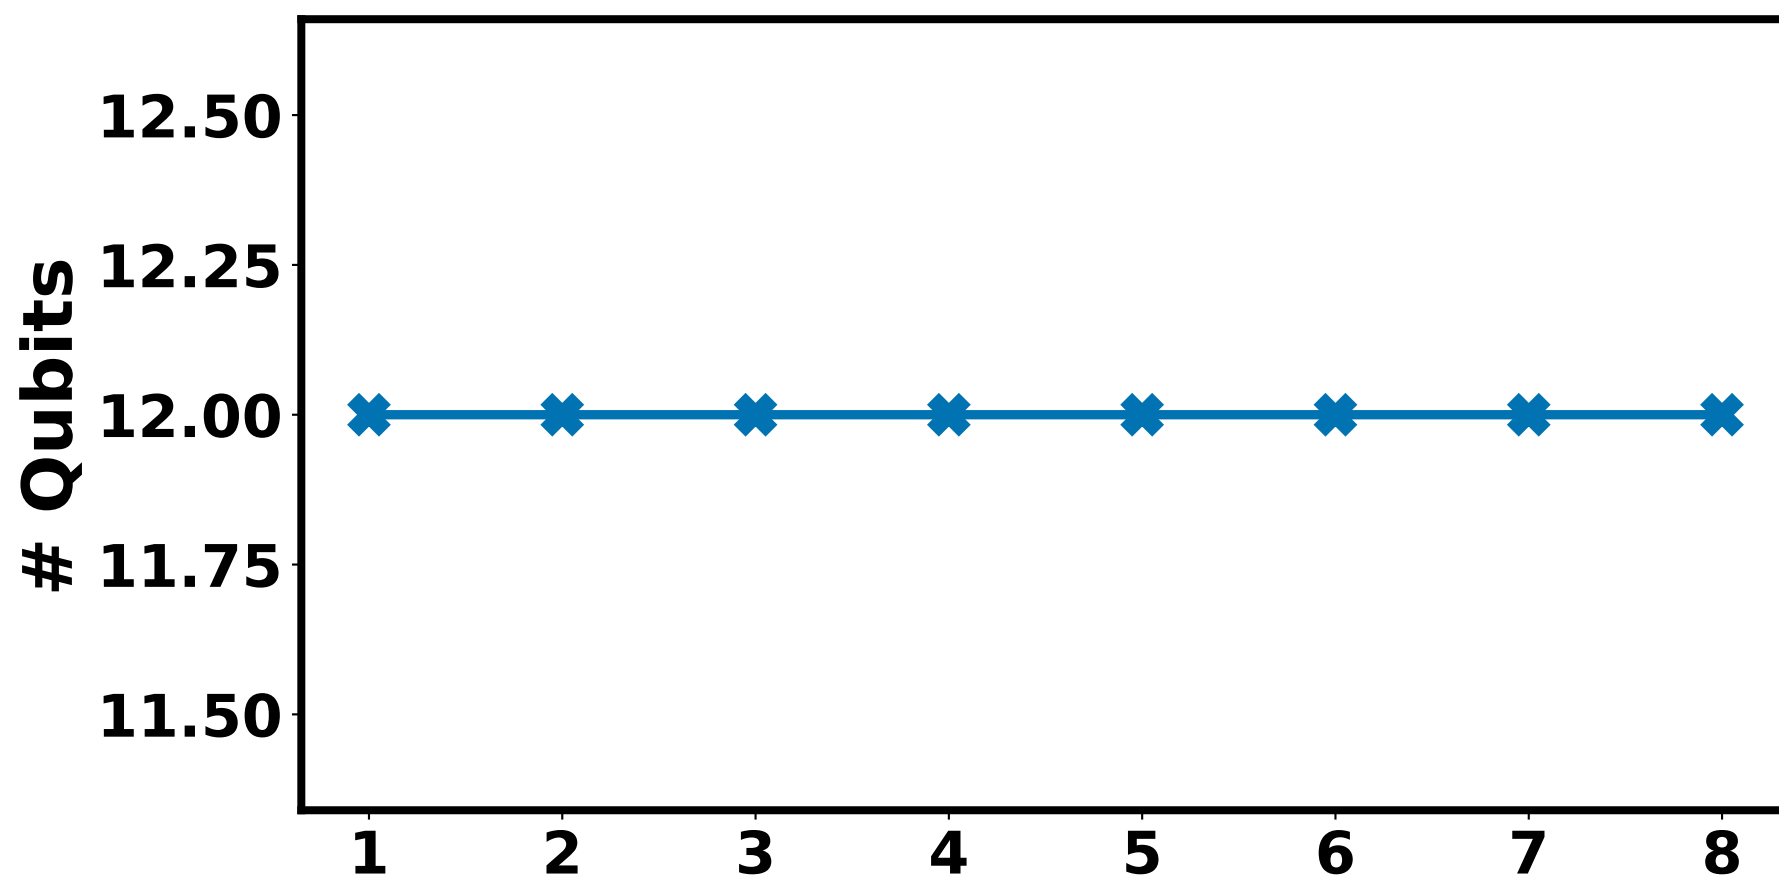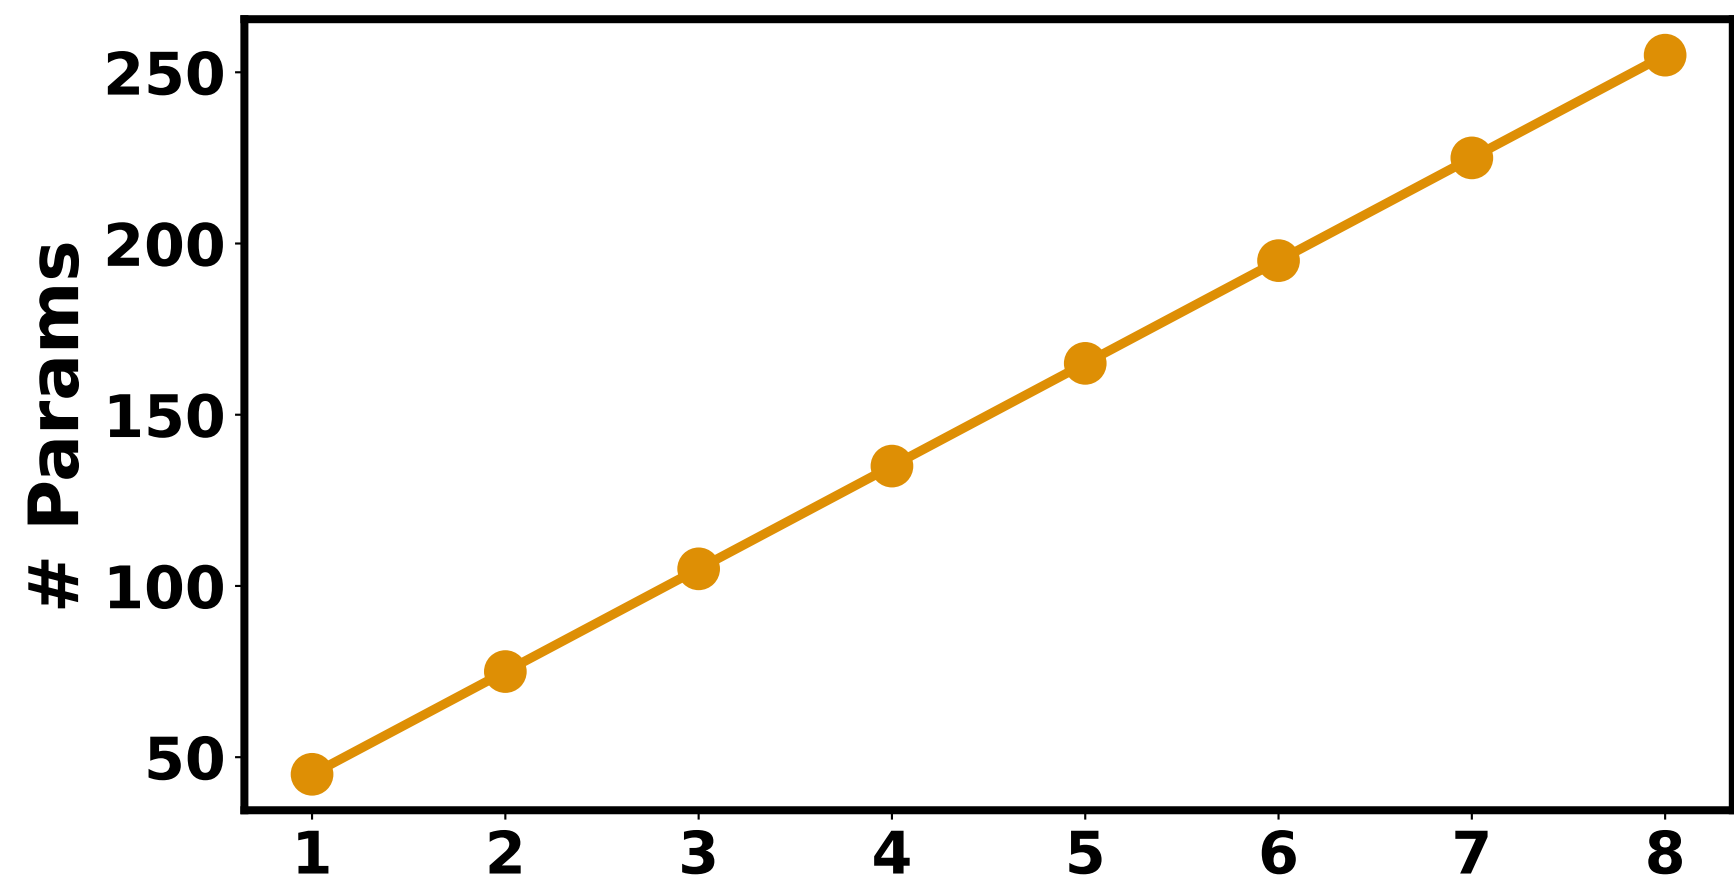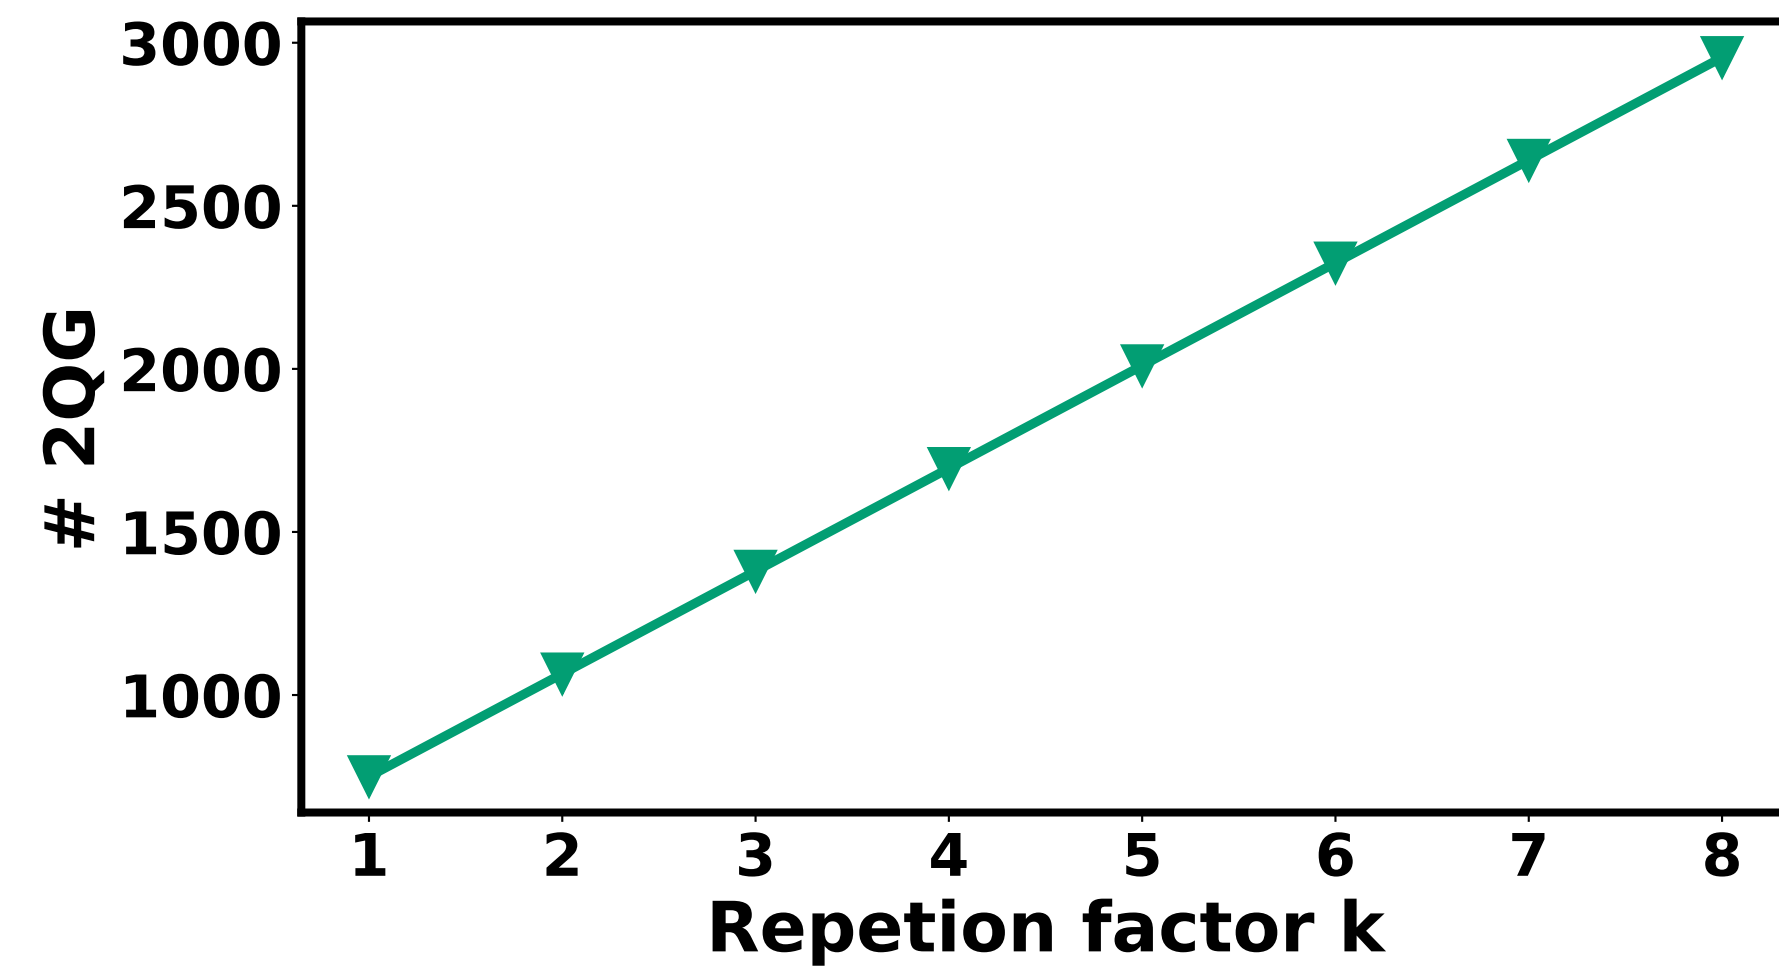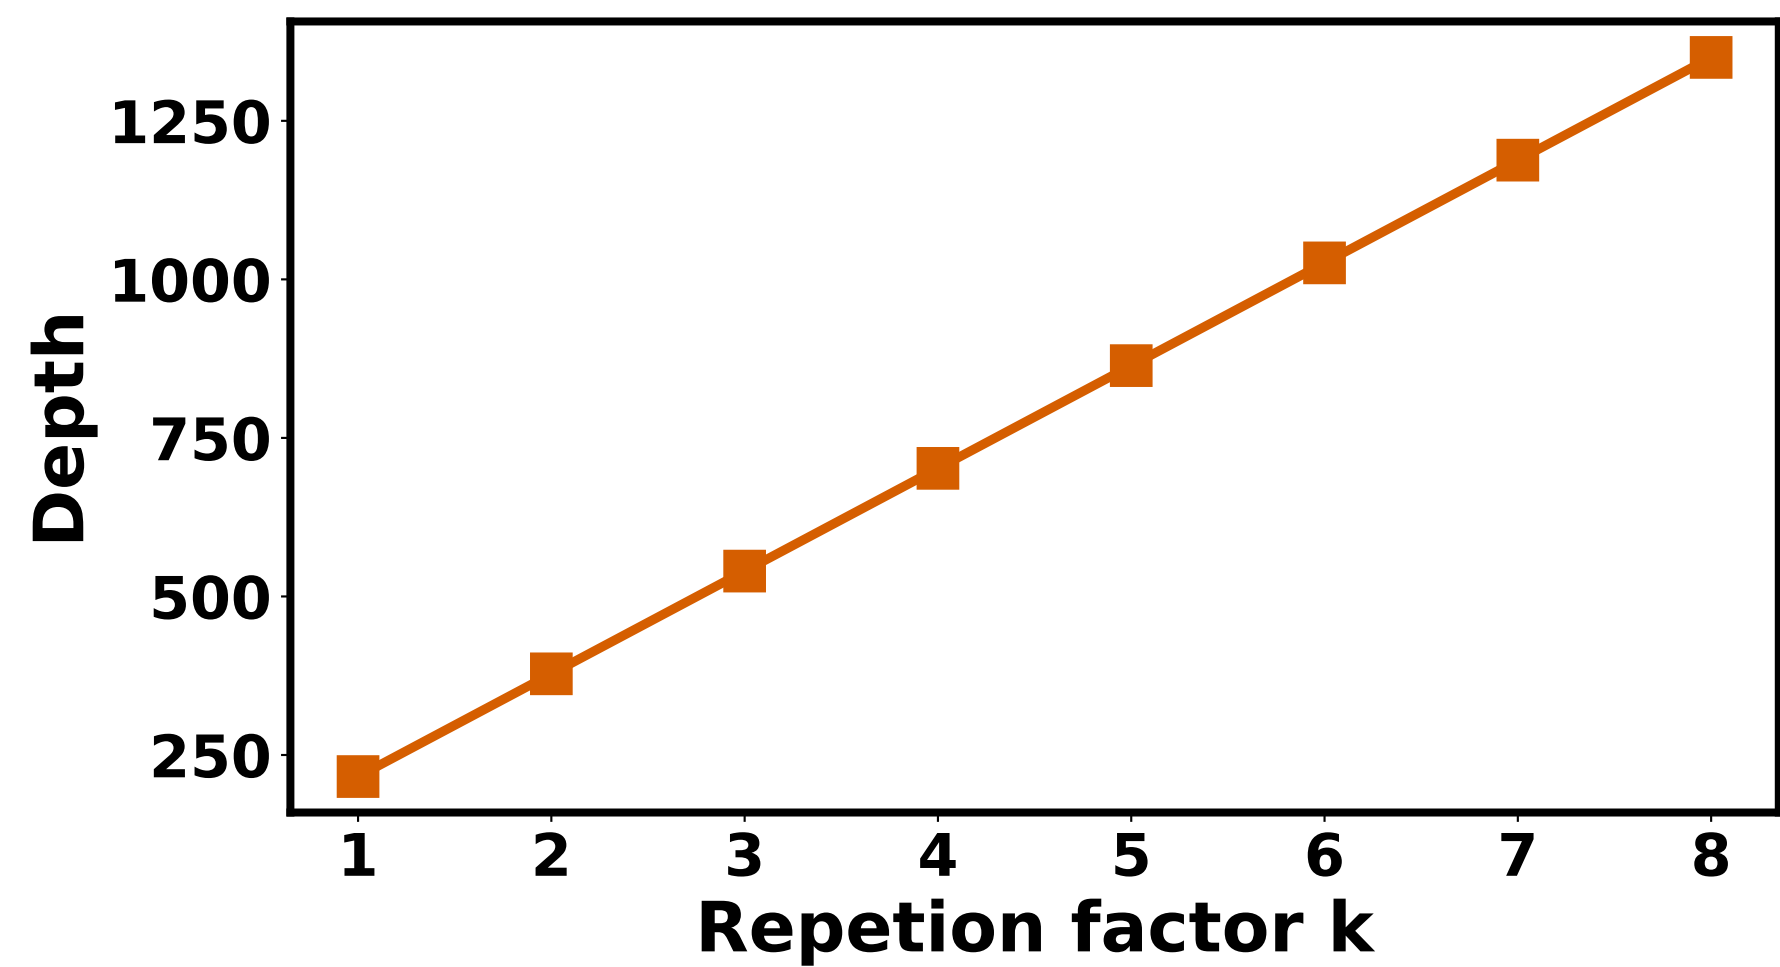

Supplement: d2sc05896k1.zip [file d2sc05896k1.zip]

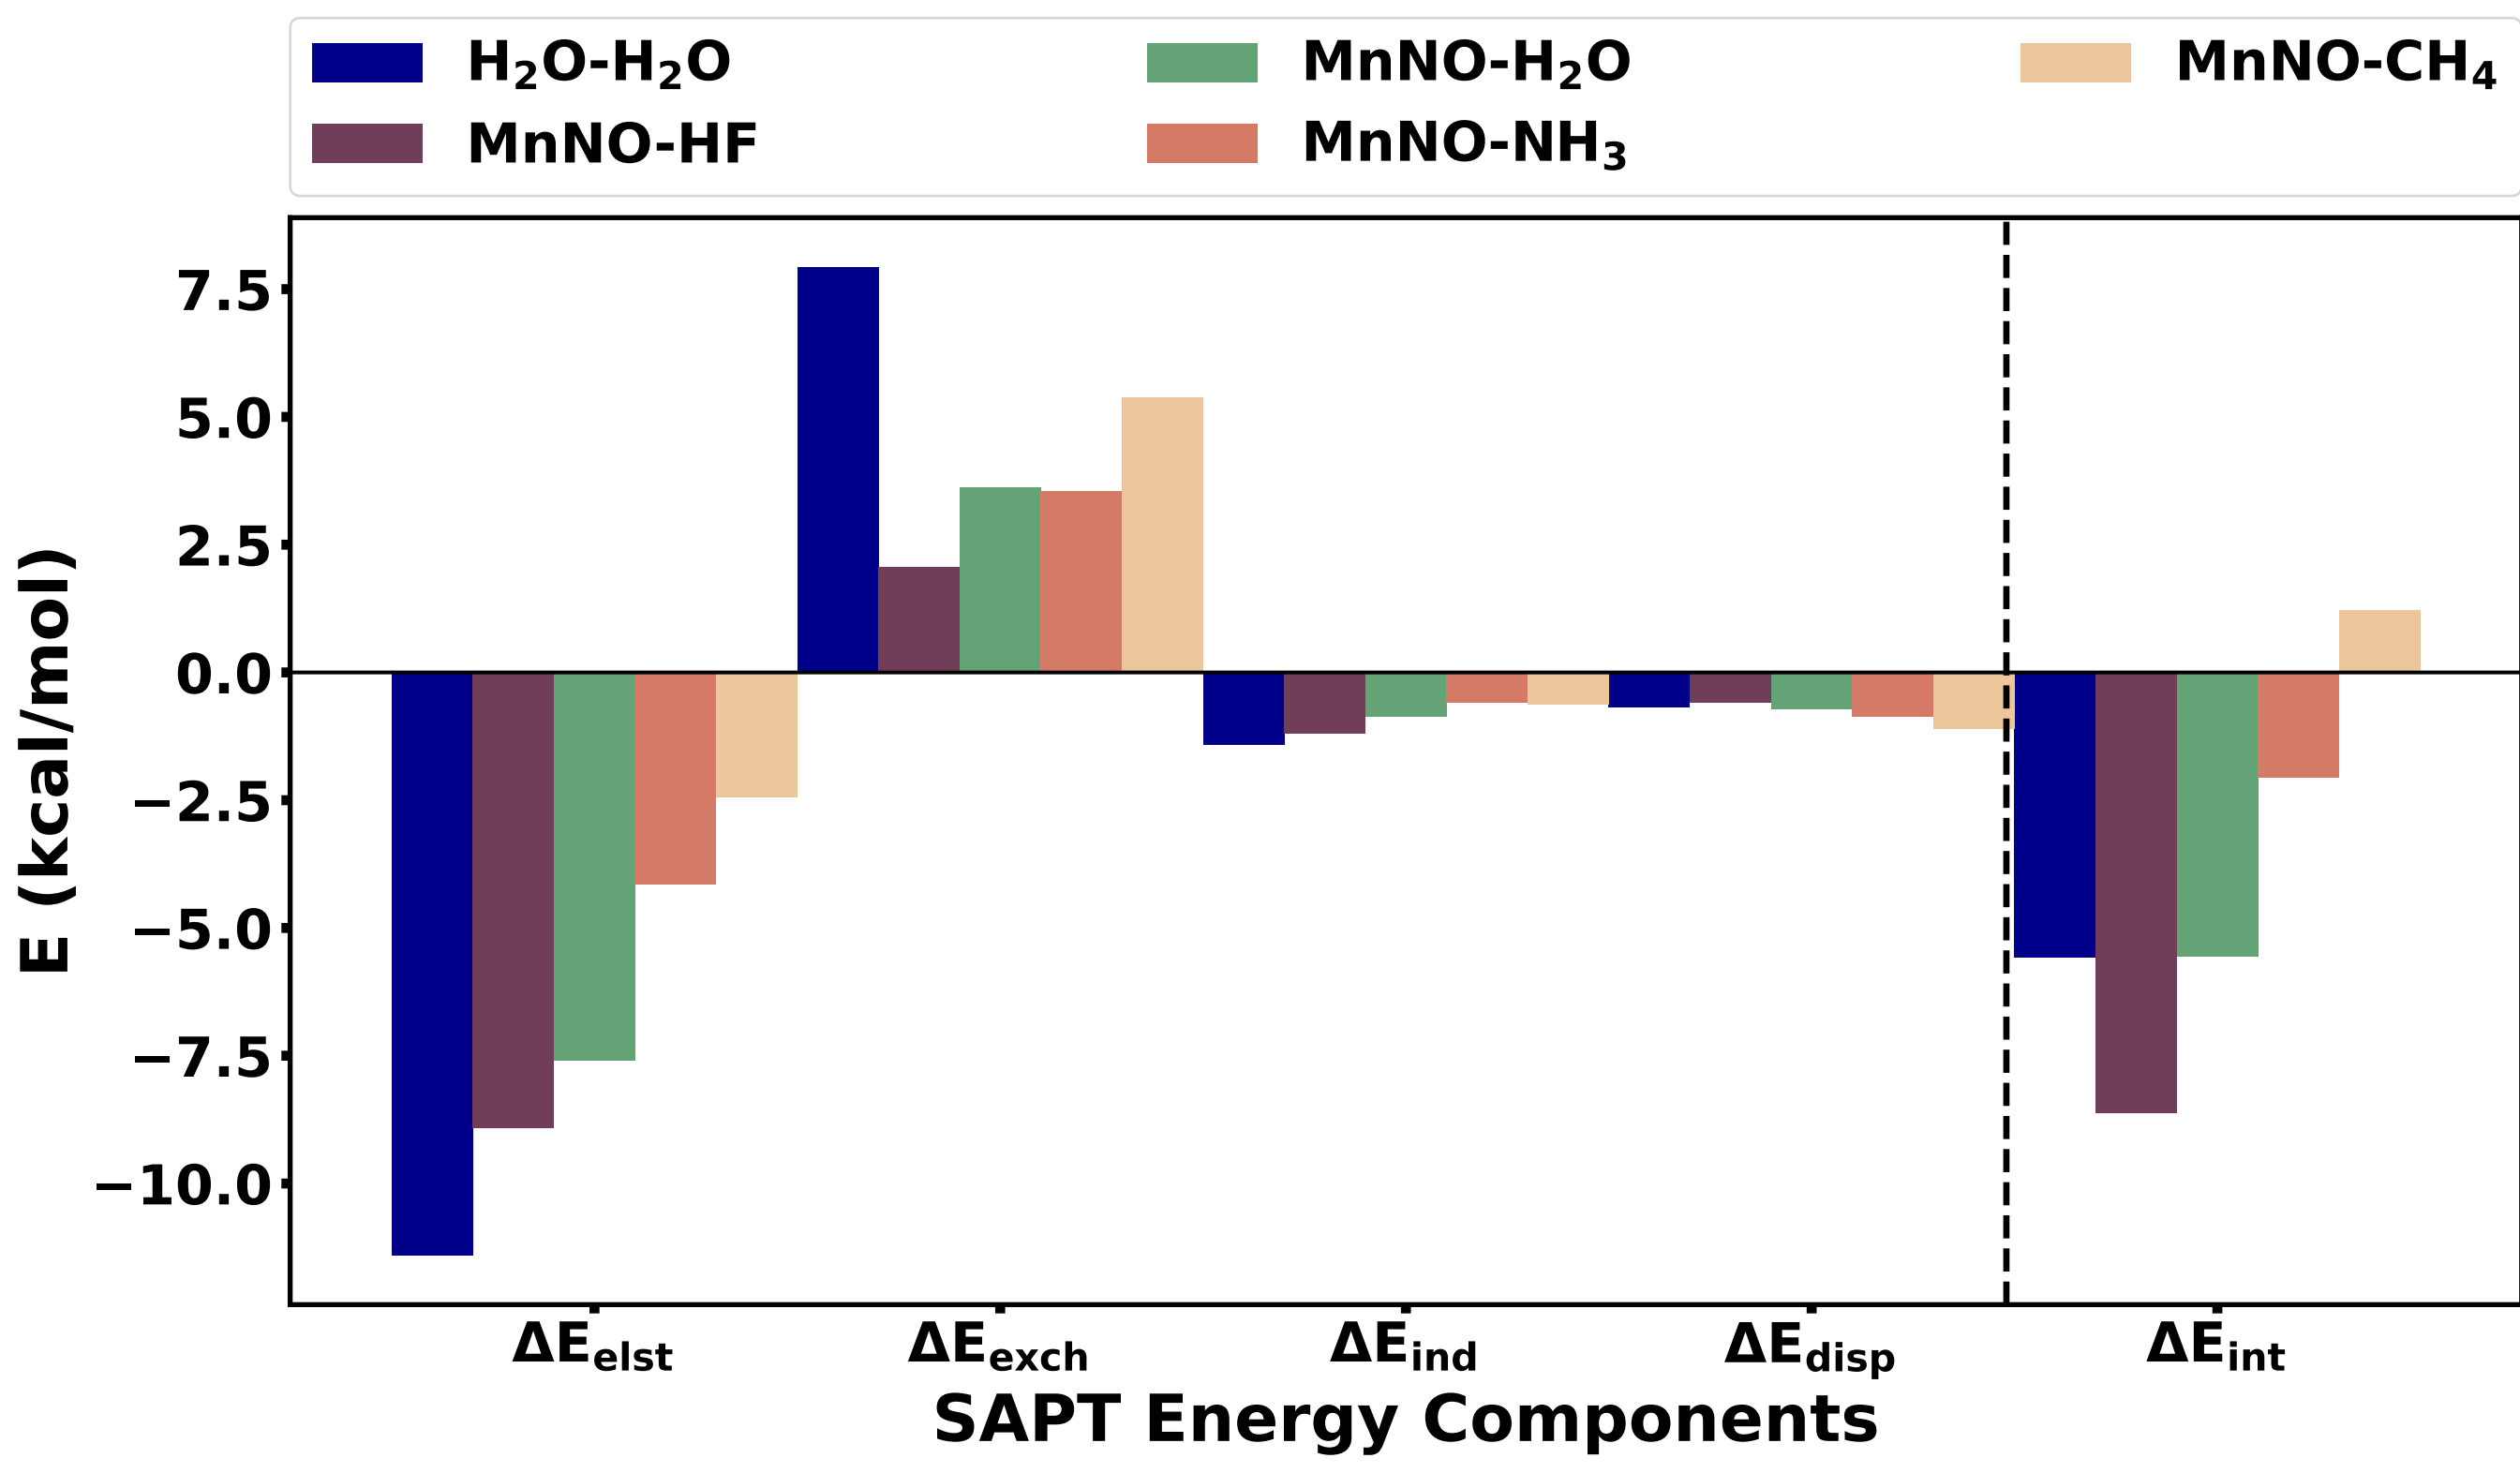

Supplement: d2sc05896k1.zip [file d2sc05896k1.zip]

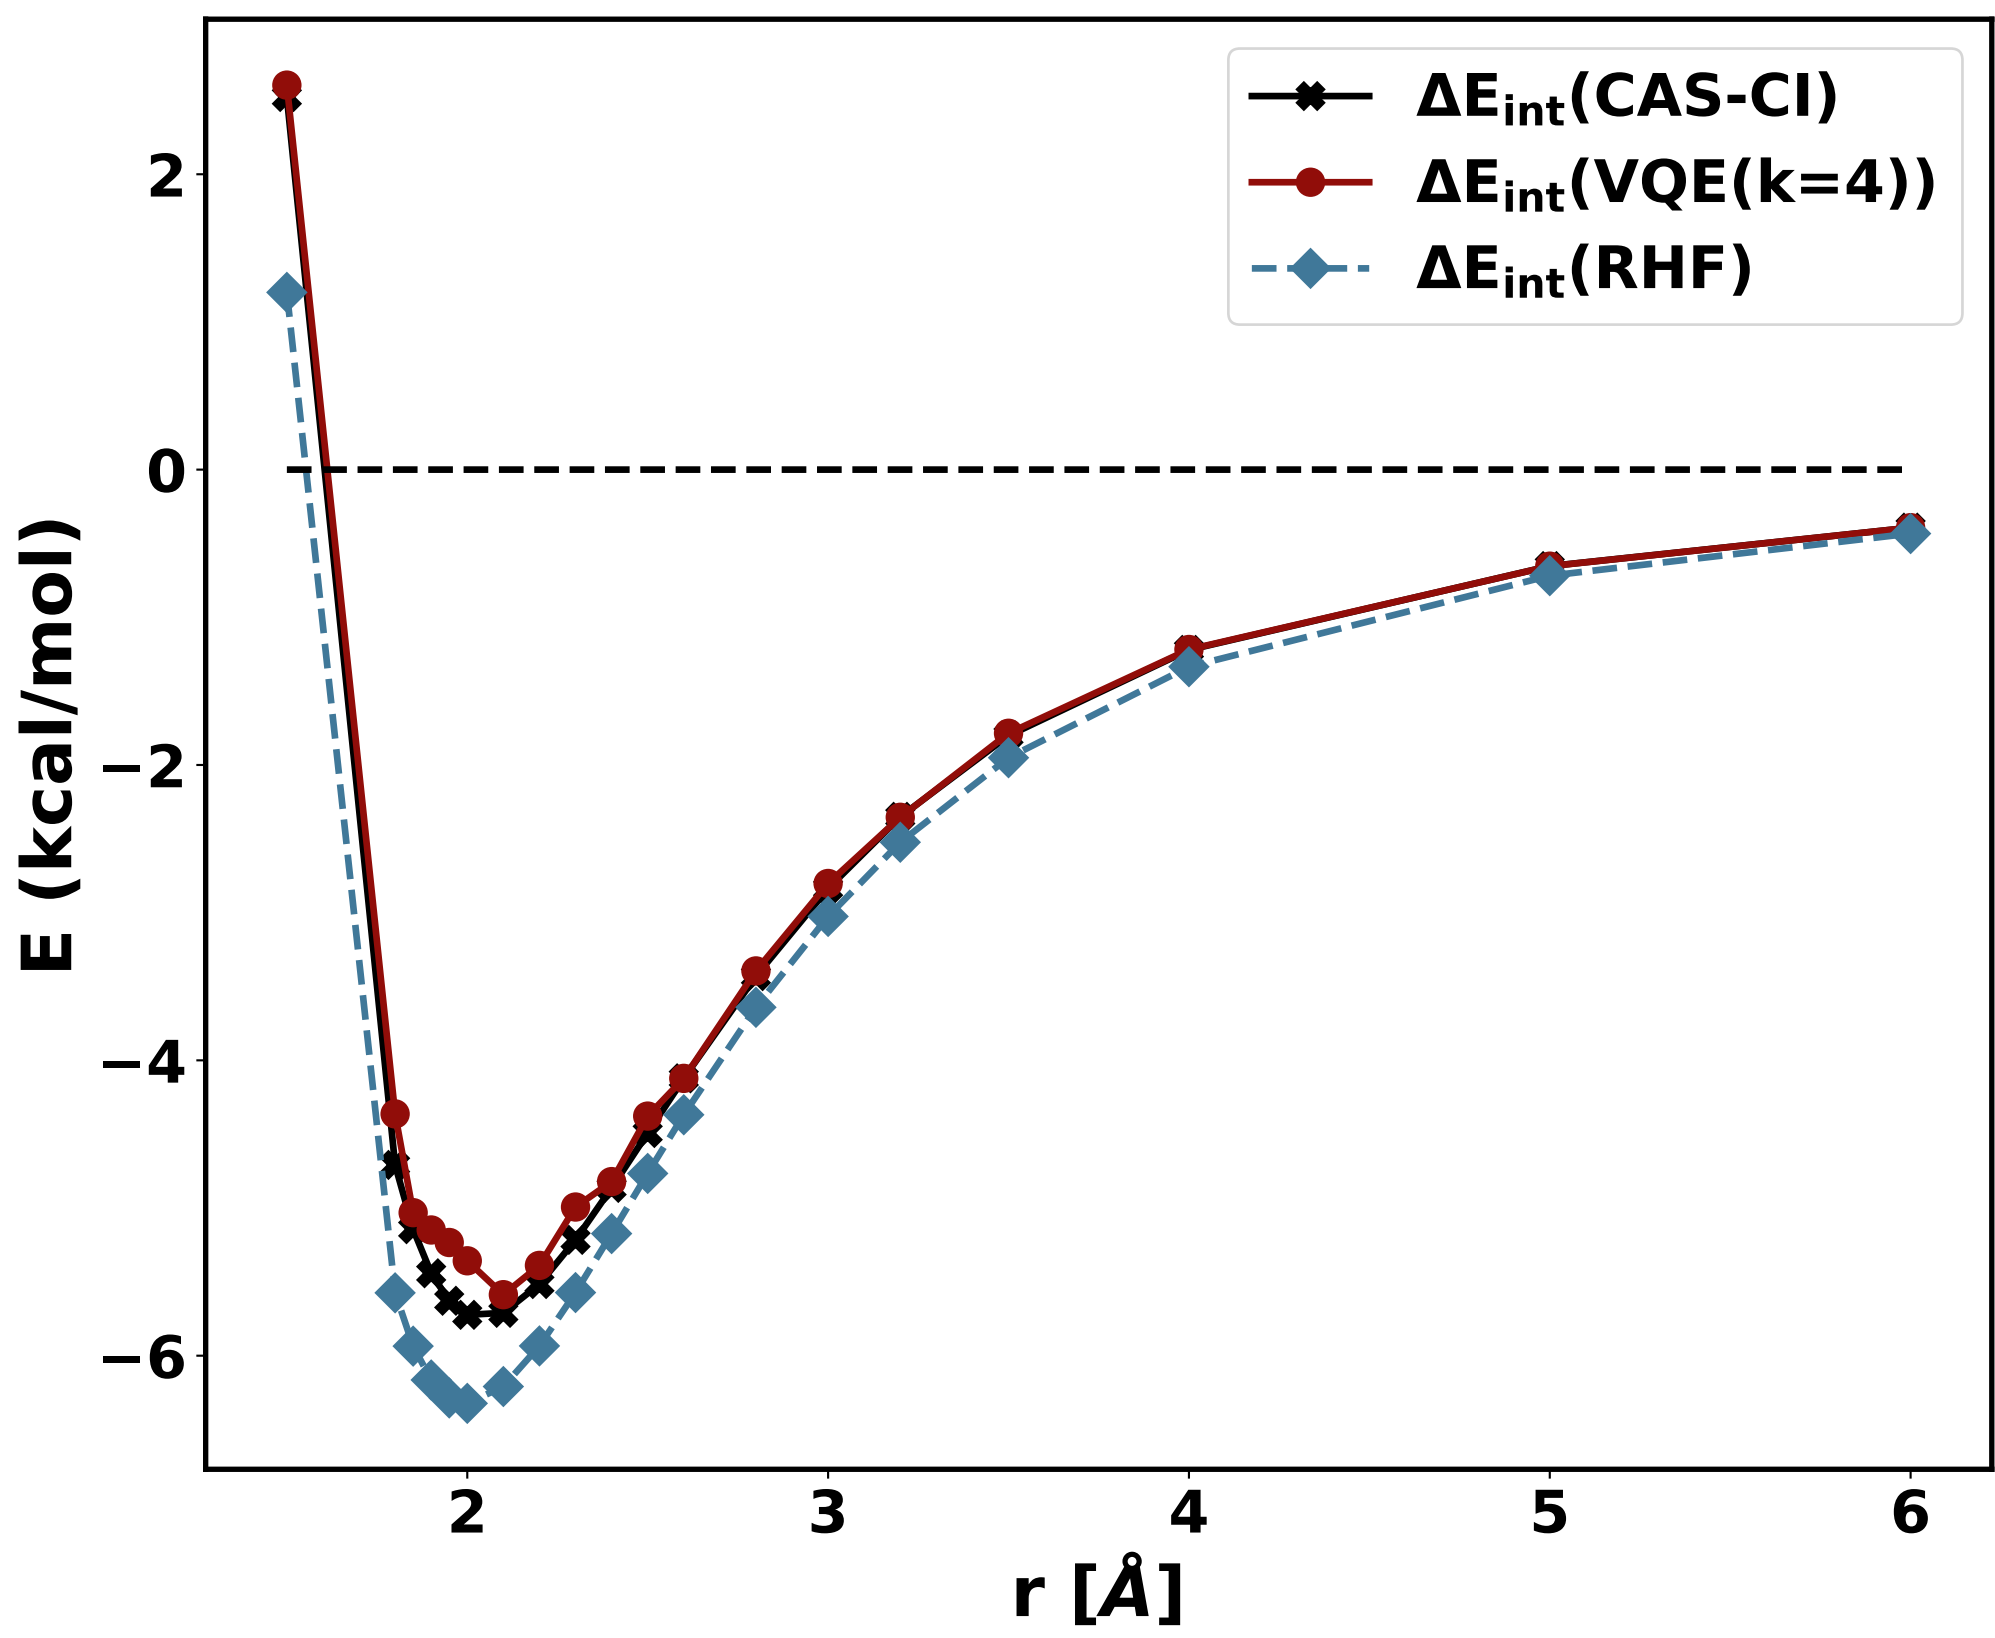

Supplement: d2sc05896k1.zip [file d2sc05896k1.zip]

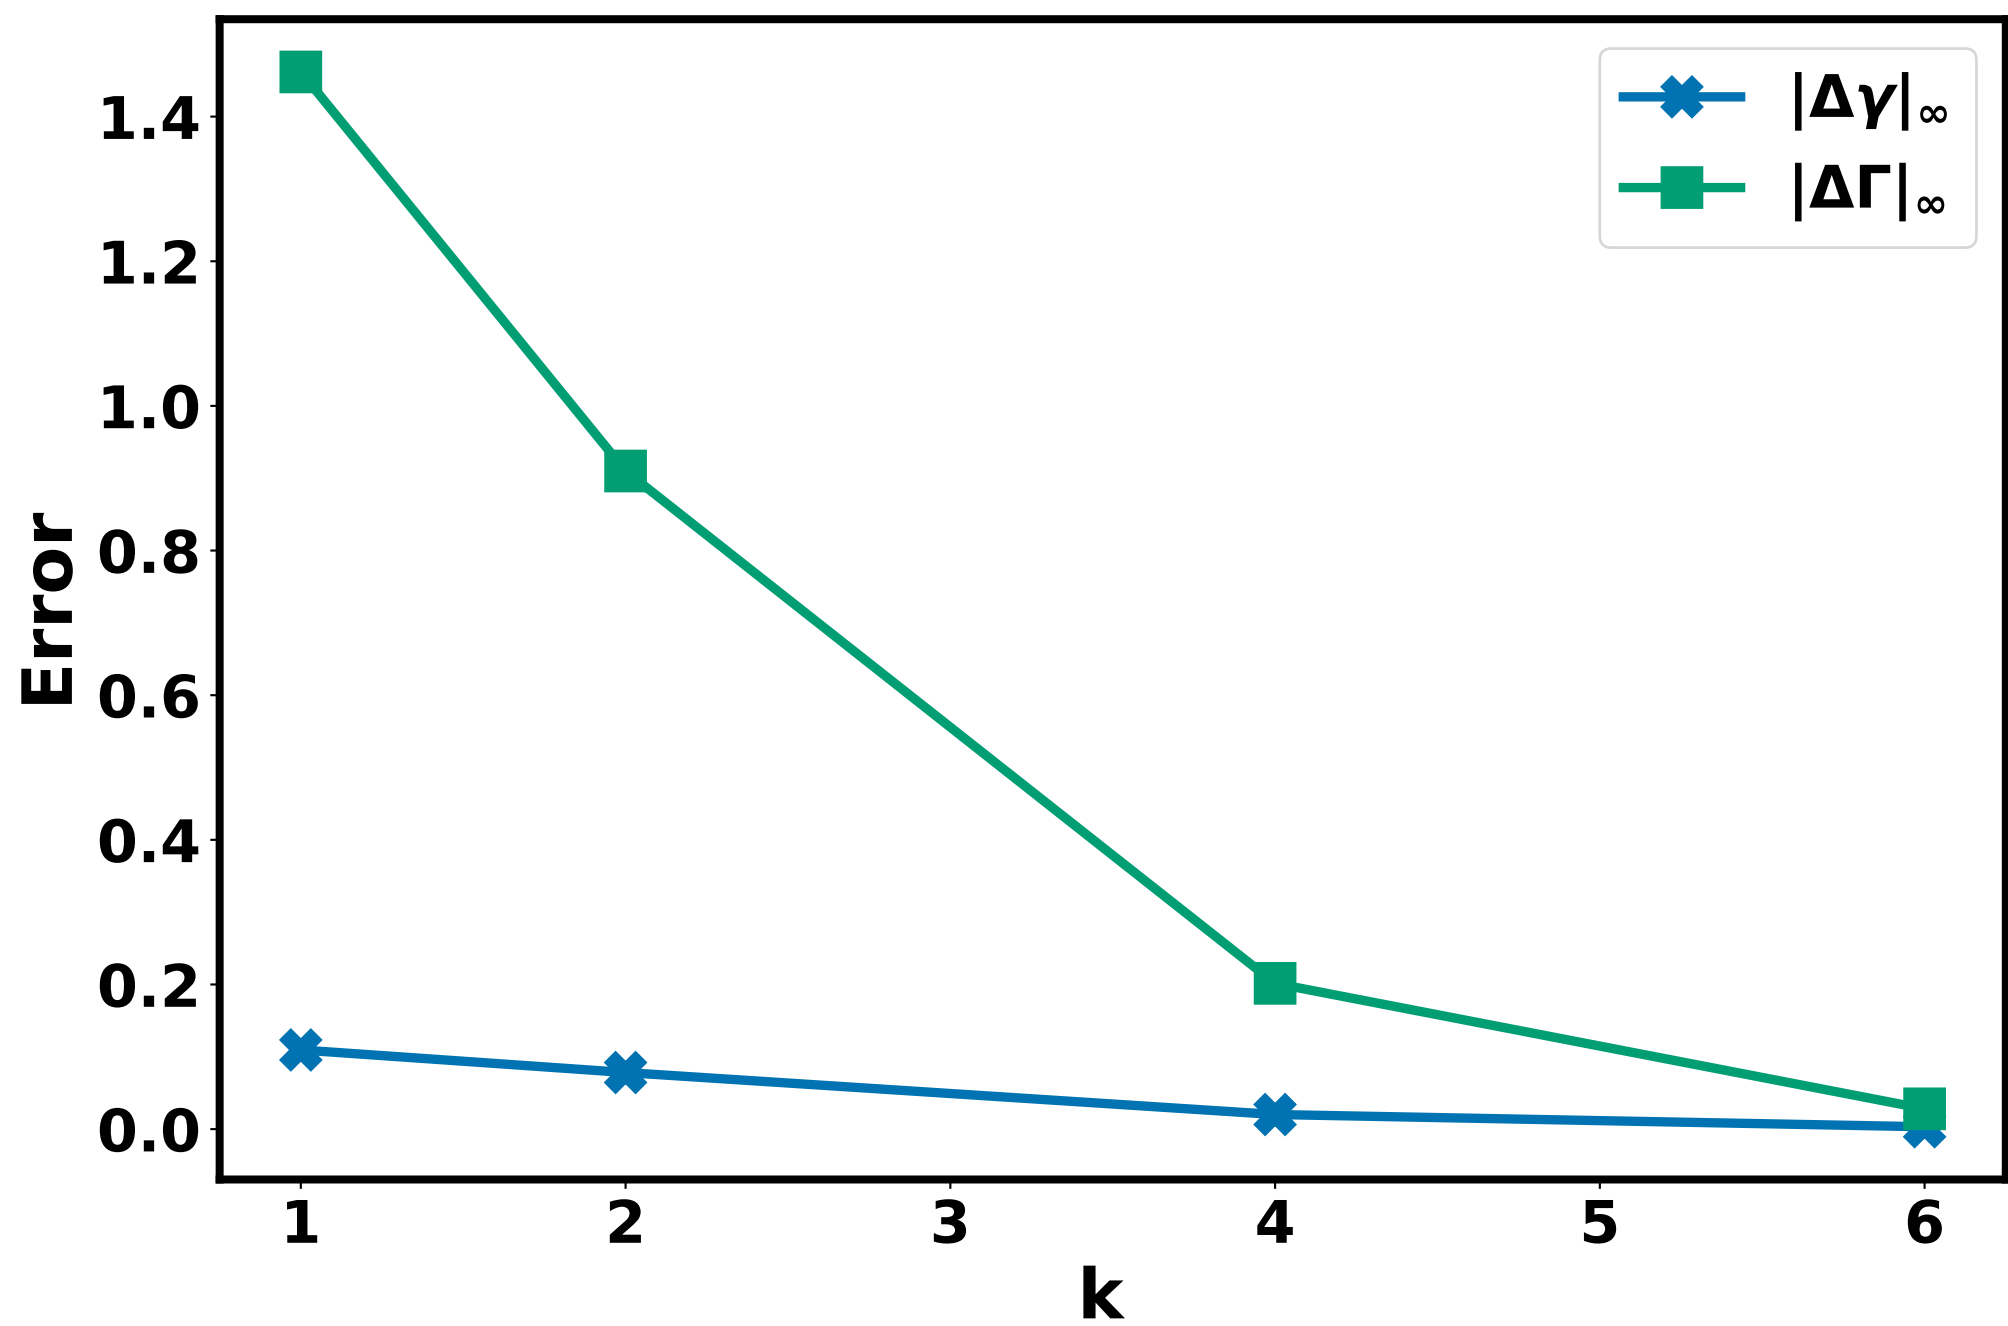

Supplement: d2sc05896k1.zip [file d2sc05896k1.zip]

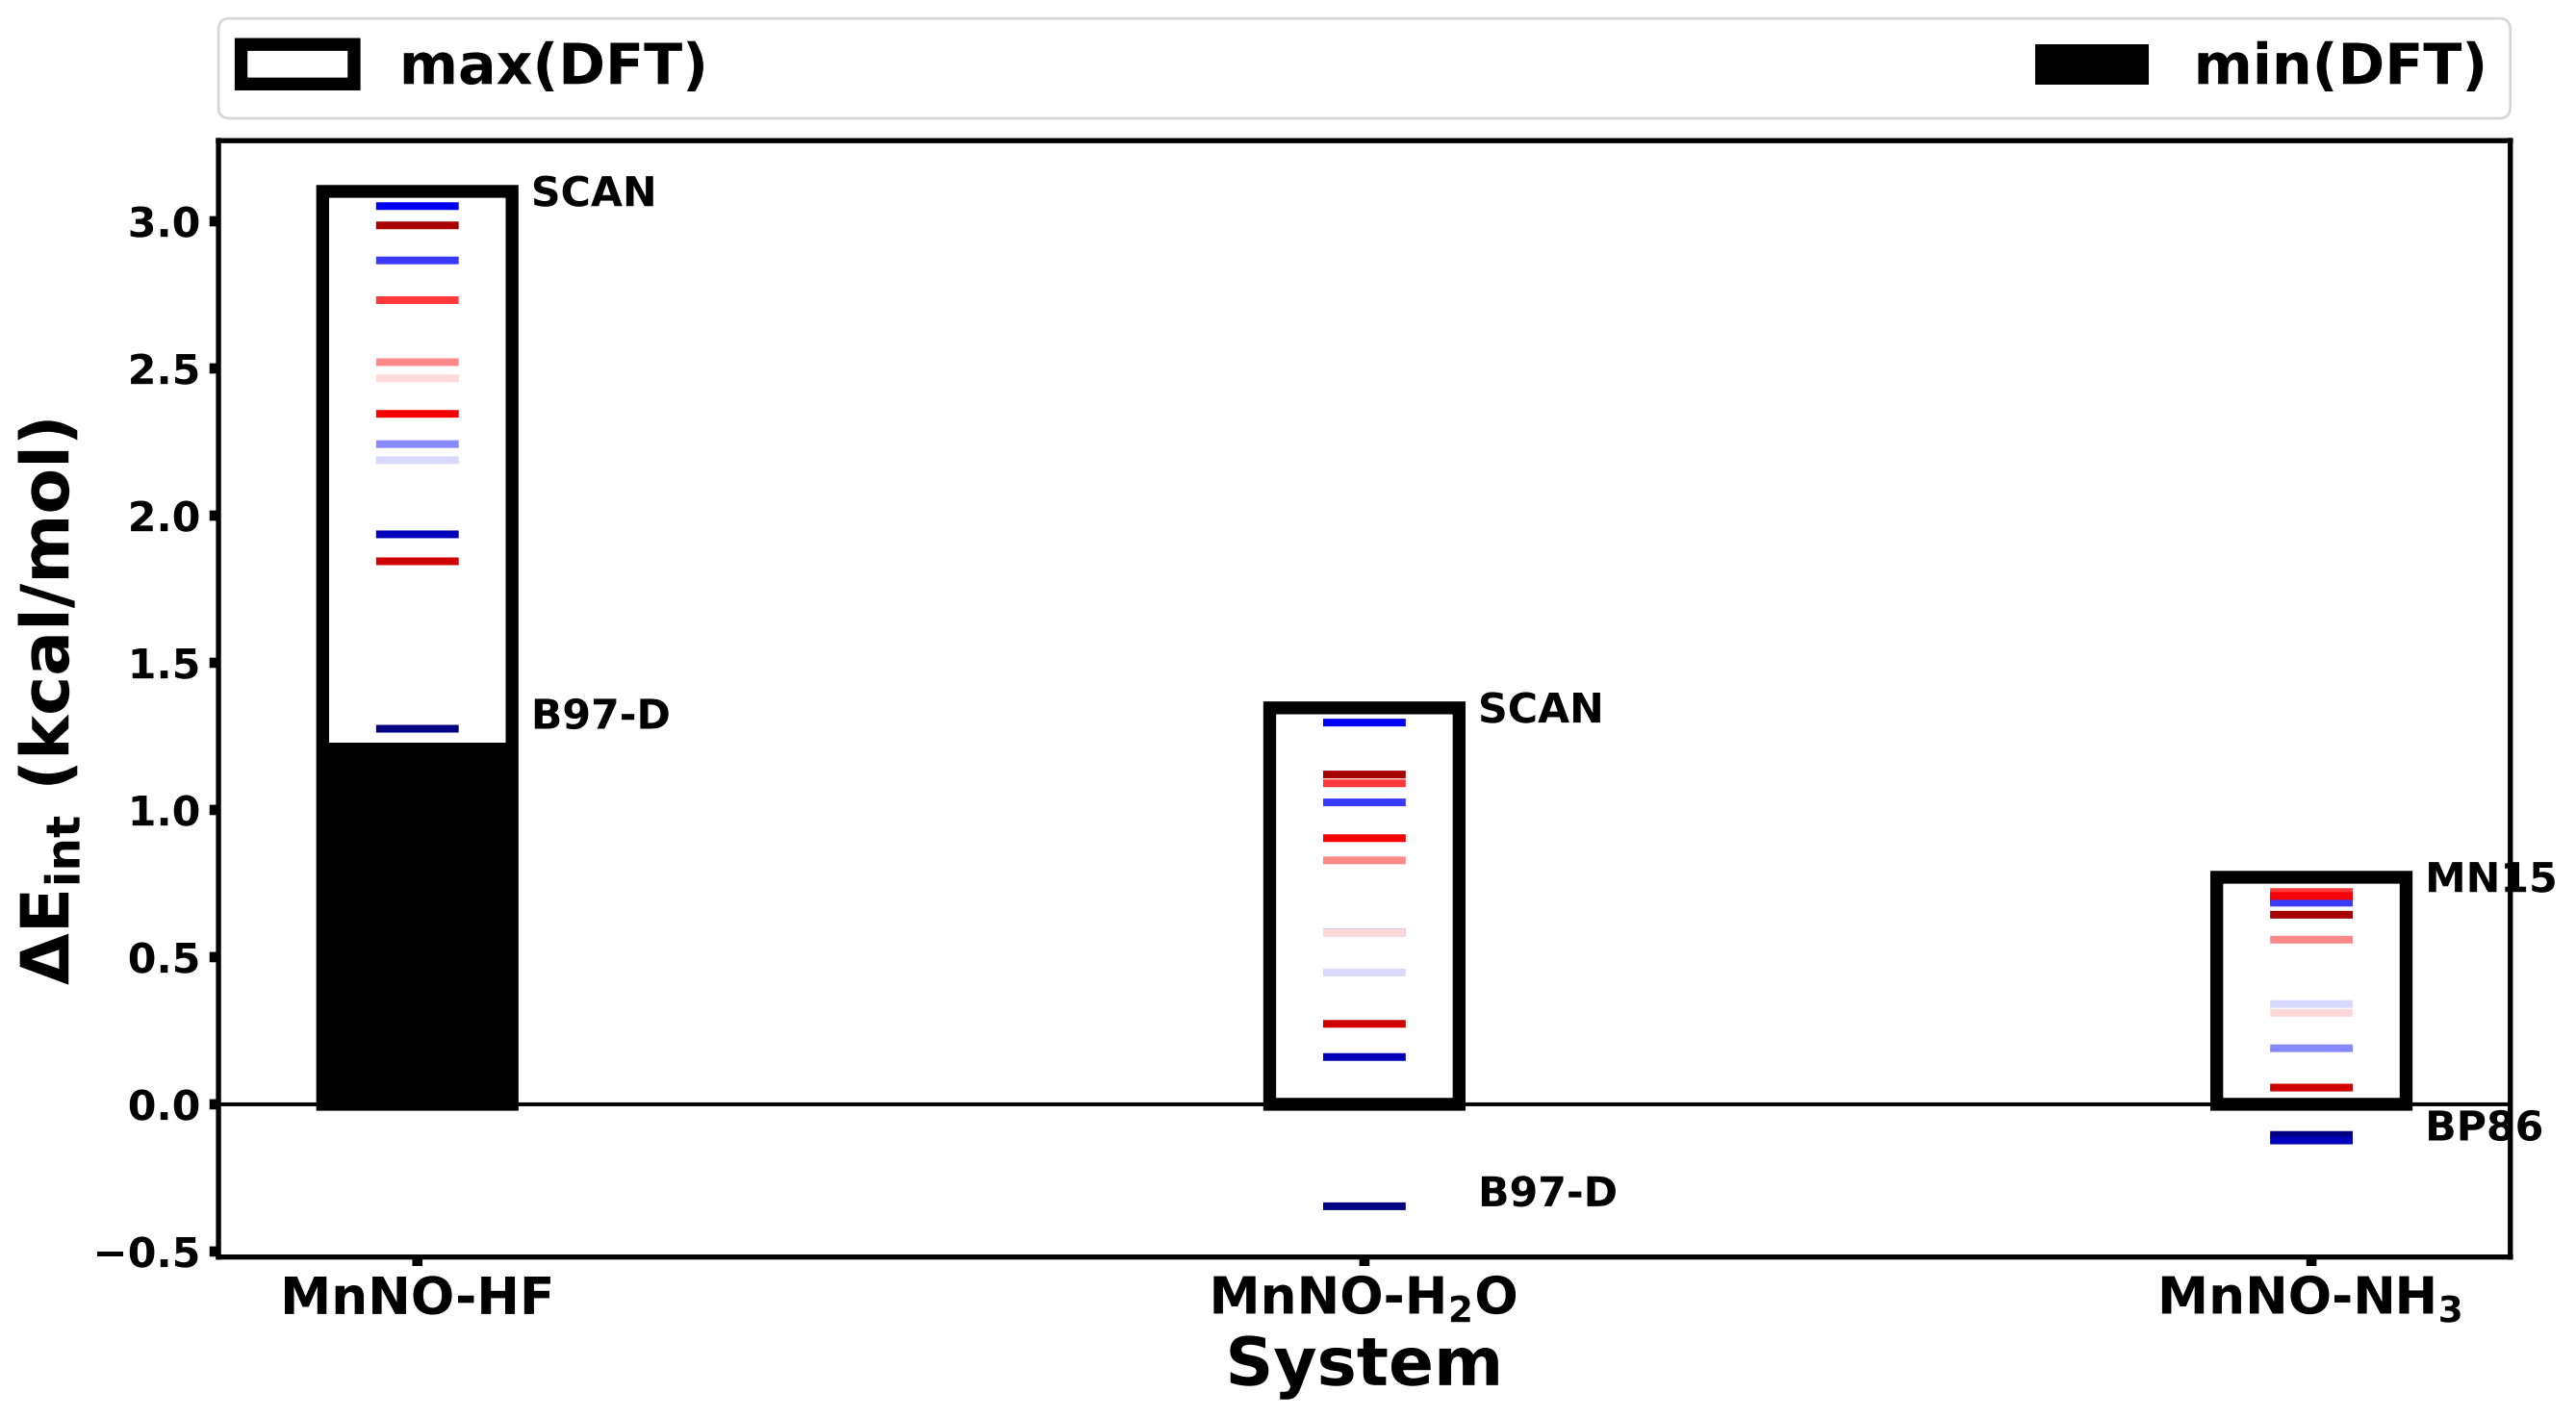

Supplement: d2sc05896k1.zip [file d2sc05896k1.zip]

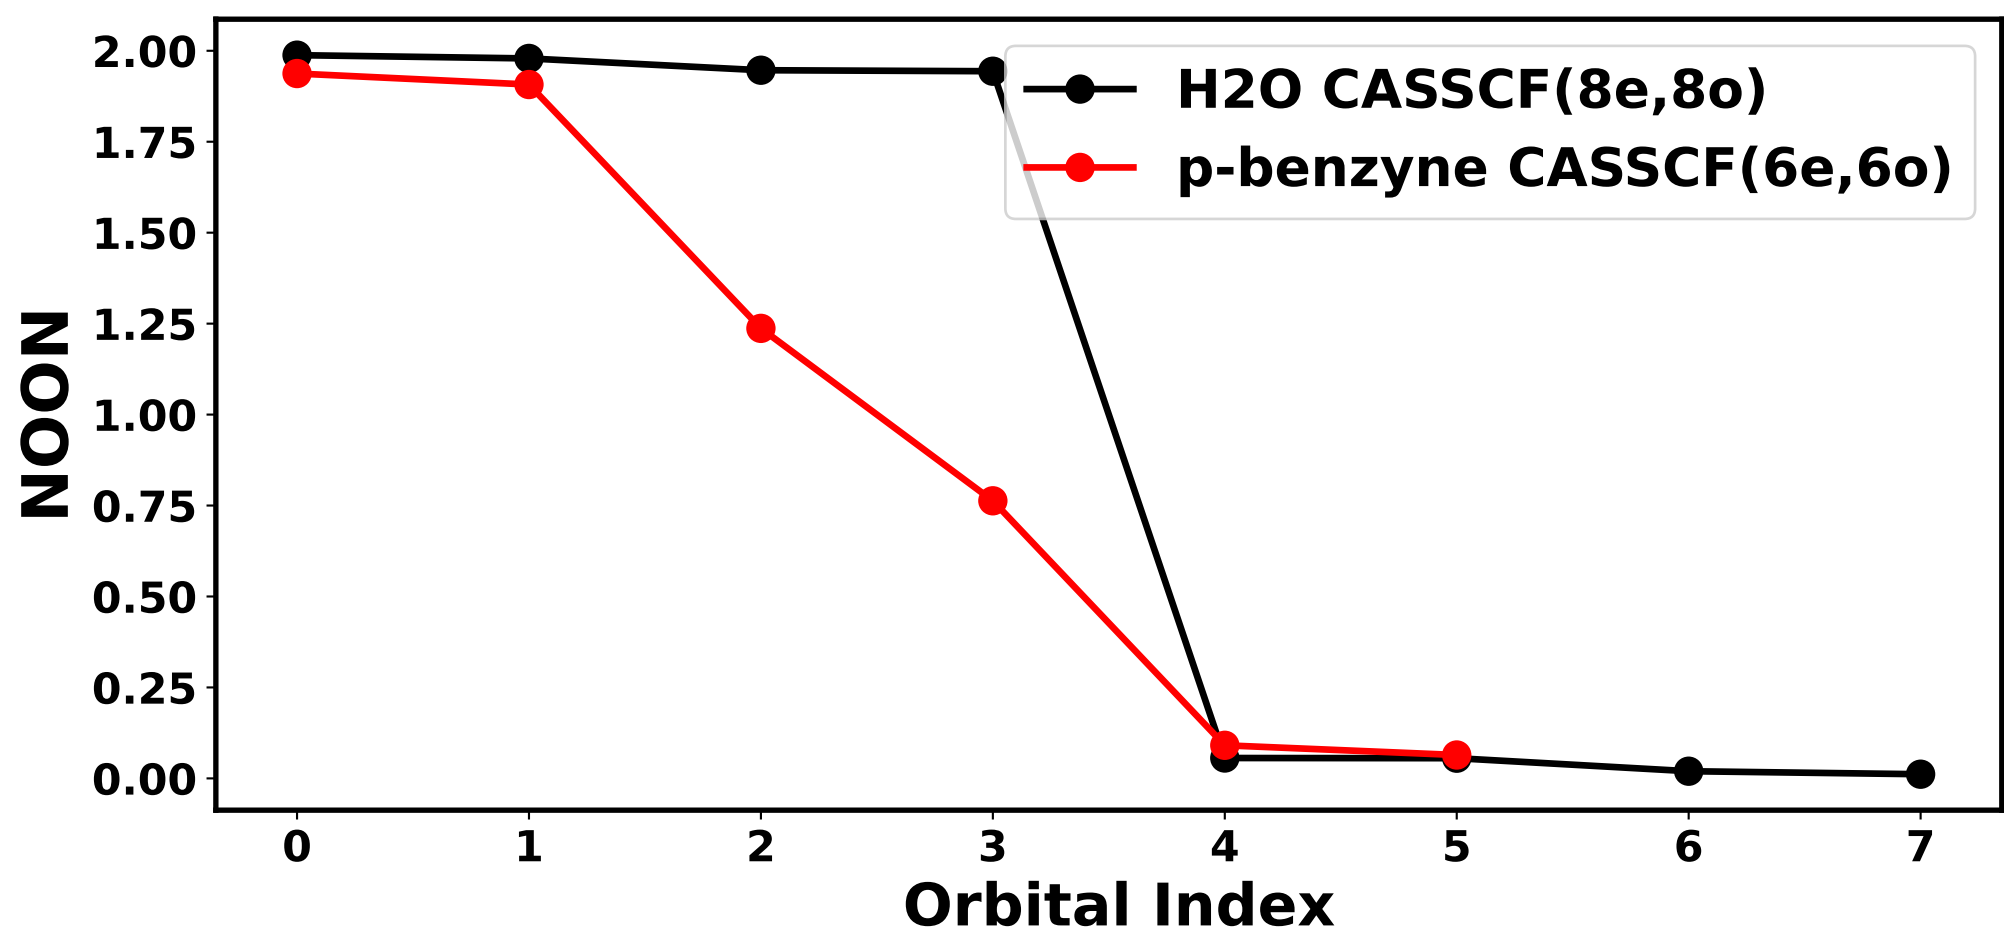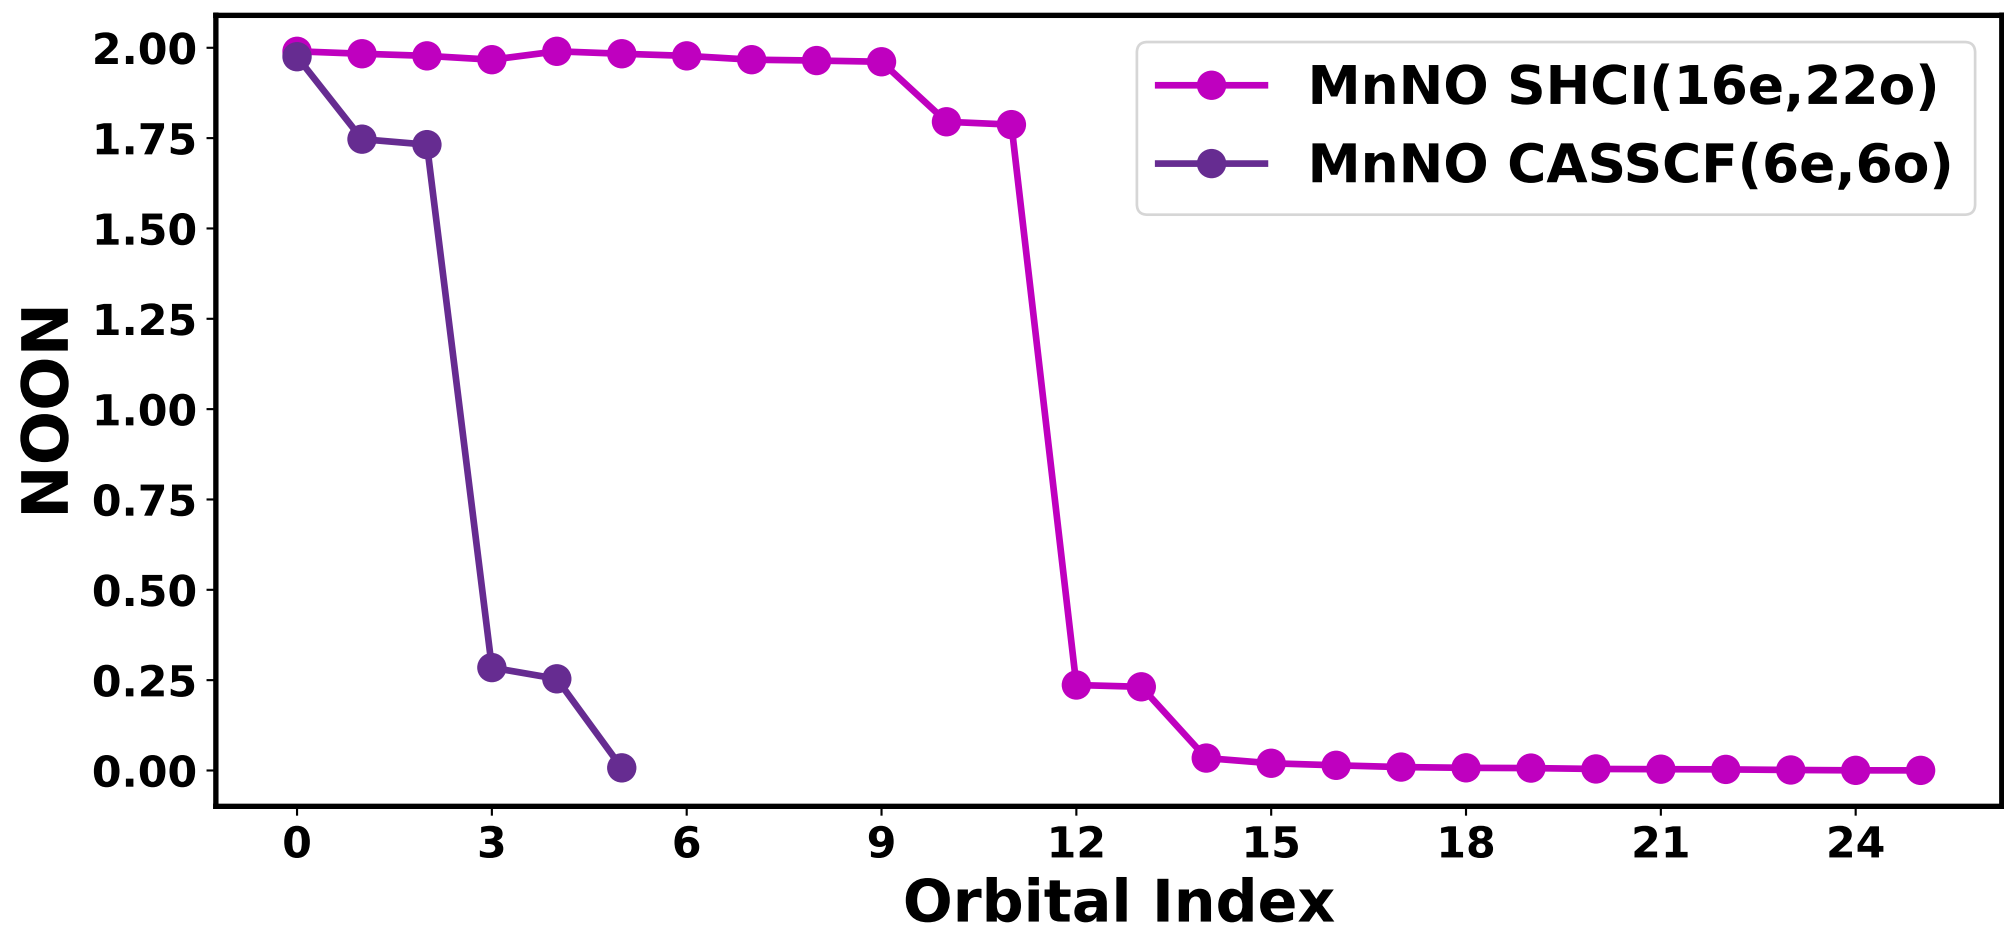

Supplement: d2sc05896k1.zip [file d2sc05896k1.zip]

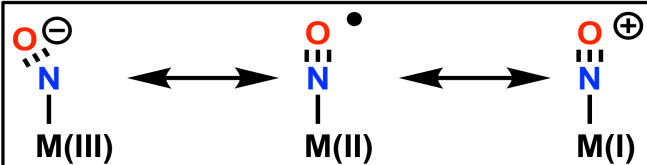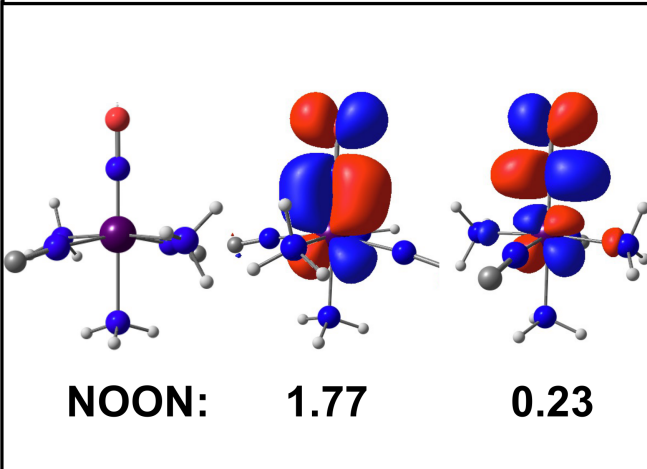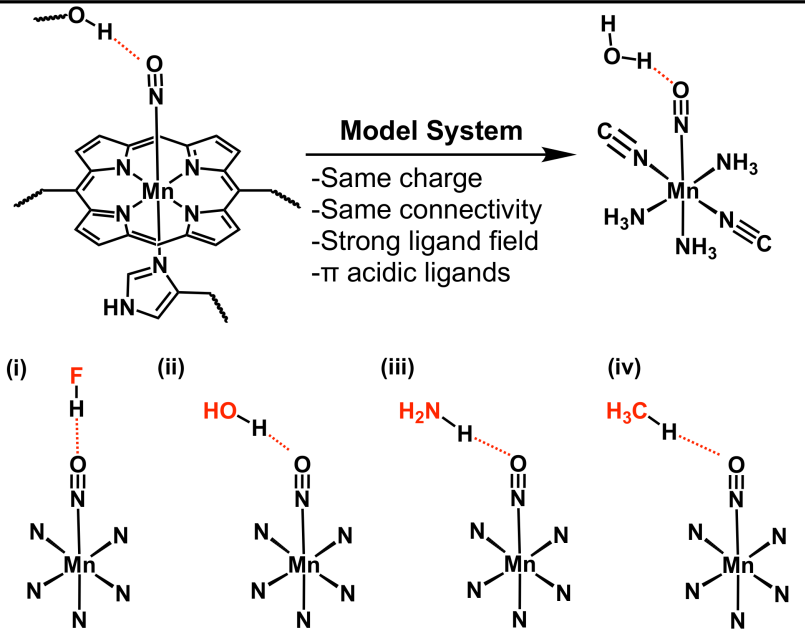

Supplement: d2sc05896k1.zip [file d2sc05896k1.zip]

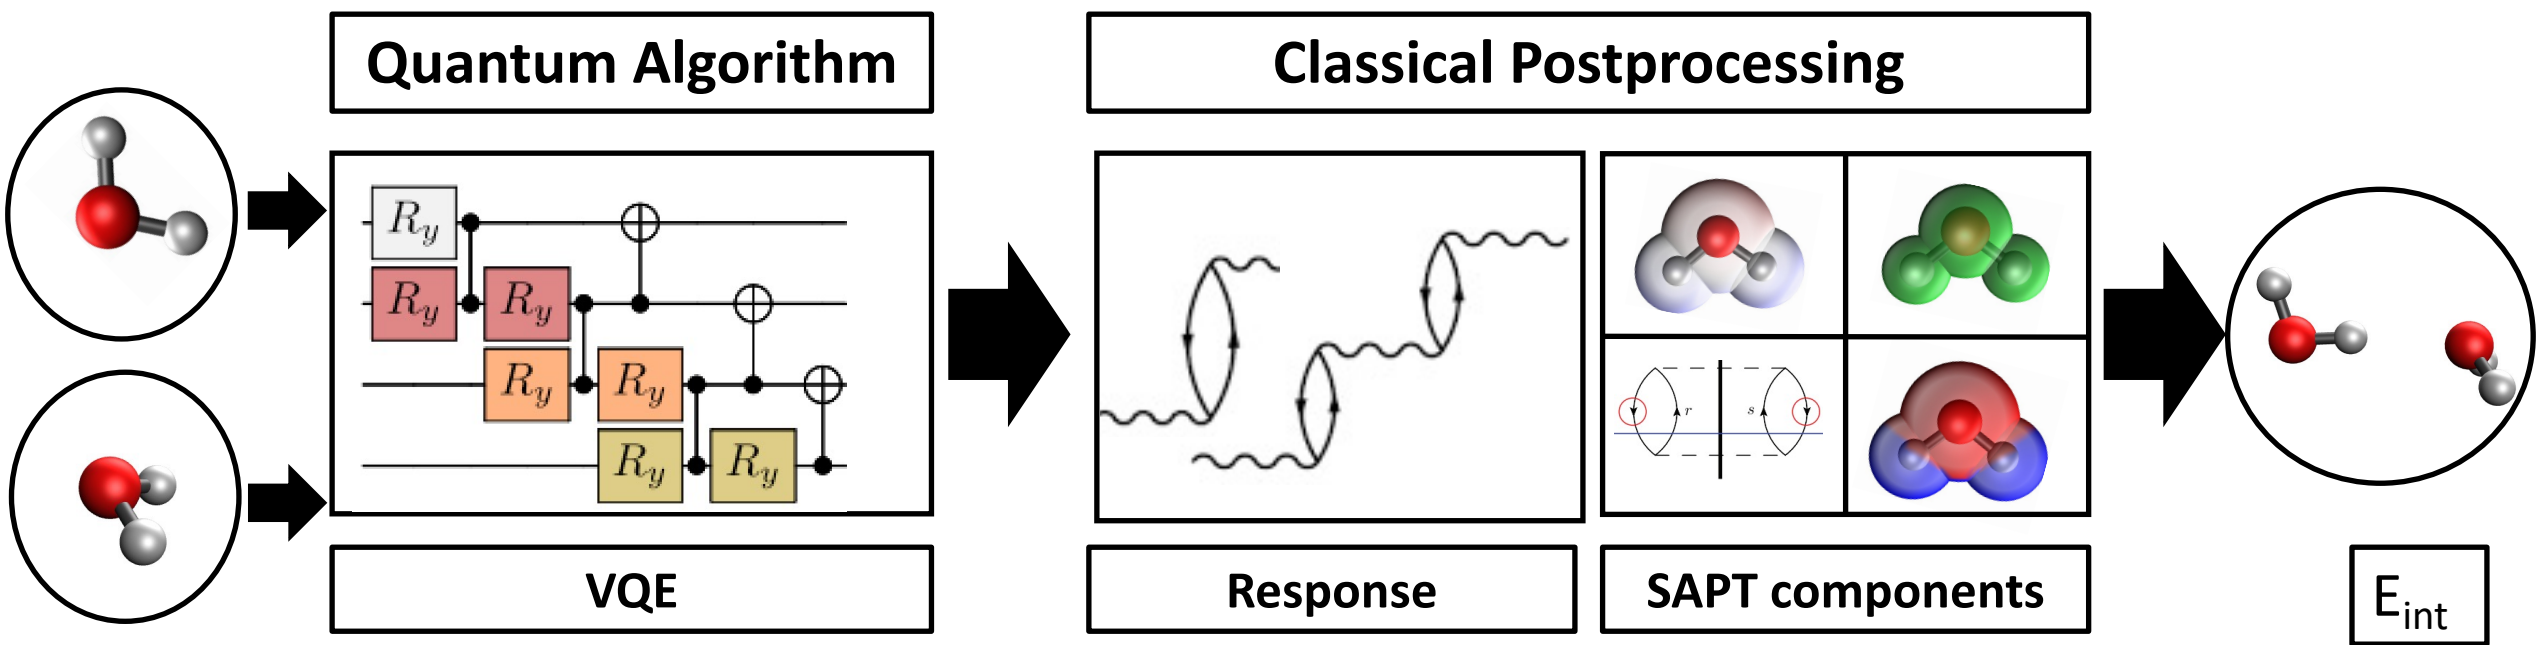

✓ NISQ algorithm

✓ Accurate Interaction Energies

Supplement: d2sc05896k1.zip [file d2sc05896k1.zip]
